# Supplementary material for: Depressive symptoms in people with vision impairment: a cross-sectional study to identify who is most at risk
Source: PubMed Central journal article supplement — BMJ Open. 2019 Jan 17;9(1):e026163. doi: 10.1136/bmjopen-2018-026163 (PMC6340416; doi:10.1136/bmjopen-2018-026163), 2019-01-17
Supplement: bmjopen-2018-026163.draft_revisions.pdf [file bmjopen-2018-026163.draft_revisions.pdf]

# BMJ Open

BMJ Open is committed to open peer review. As part of this commitment we make the peer review history of every article we publish publicly available.

When an article is published we post the peer reviewers' comments and the authors' responses online. We also post the versions of the paper that were used during peer review. These are the versions that the peer review comments apply to.

The versions of the paper that follow are the versions that were submitted during the peer review process. They are not the versions of record or the final published versions. They should not be cited or distributed as the published version of this manuscript.

BMJ Open is an open access journal and the full, final, typeset and author-corrected version of record of the manuscript is available on our site with no access controls, subscription charges or pay-per-view fees (<http://bmjopen.bmj.com>).

If you have any questions on BMJ Open's open peer review process please email [editorial.bmjopen@bmj.com](mailto:editorial.bmjopen@bmj.com)

# BMJ Open

## Depressive symptoms in people with a vision impairment: A cross-sectional study to identify who is most at risk

|                               |                                                                                                                                                                                                                                                                                                                                                                                                                                                                                                                                                                                                                                                                                                                                                                                                               |
|-------------------------------|---------------------------------------------------------------------------------------------------------------------------------------------------------------------------------------------------------------------------------------------------------------------------------------------------------------------------------------------------------------------------------------------------------------------------------------------------------------------------------------------------------------------------------------------------------------------------------------------------------------------------------------------------------------------------------------------------------------------------------------------------------------------------------------------------------------|
| Journal:                      | <i>BMJ Open</i>                                                                                                                                                                                                                                                                                                                                                                                                                                                                                                                                                                                                                                                                                                                                                                                               |
| Manuscript ID                 | bmjopen-2018-026163                                                                                                                                                                                                                                                                                                                                                                                                                                                                                                                                                                                                                                                                                                                                                                                           |
| Article Type:                 | Research                                                                                                                                                                                                                                                                                                                                                                                                                                                                                                                                                                                                                                                                                                                                                                                                      |
| Date Submitted by the Author: | 20-Aug-2018                                                                                                                                                                                                                                                                                                                                                                                                                                                                                                                                                                                                                                                                                                                                                                                                   |
| Complete List of Authors:     | Nollett, Claire; Cardiff University, Centre for Trials Research<br>Ryan, Barbara; Cardiff University, School of Optometry and Vision Sciences<br>Bray, Nathan; Centre for Health Economics and Medicines Evaluation, Bangor University,<br>Bunce, Catey; Kings College London, School of Population and Environmental Sciences<br>Casten, Robin; Thomas Jefferson University, Department of Psychiatry and Human Behaviour<br>Edwards, Rhiannon; Bangor University, Centre for Health Economics & Medicines Evaluation<br>Gillespie, David; Cardiff University, Centre for Trials Research<br>Smith, Daniel; University of Glasgow, Institute of Health and Wellbeing<br>Stanford, Miles; St Thomas' Hospital, Medical Eye Unit<br>Margrain, Tom; Cardiff University, School of Optometry and Vision Sciences |
| Keywords:                     | Depression & mood disorders < PSYCHIATRY, GERIATRIC MEDICINE, OPHTHALMOLOGY                                                                                                                                                                                                                                                                                                                                                                                                                                                                                                                                                                                                                                                                                                                                   |
|                               |                                                                                                                                                                                                                                                                                                                                                                                                                                                                                                                                                                                                                                                                                                                                                                                                               |

SCHOLARONE™  
Manuscripts

only

1  
2  
3 **Depressive symptoms in people with a vision impairment: A cross-sectional study to identify who**  
4 **is most at risk**  
5  
6  
7  
8

9 Claire Nollett, Centre for Trials Research, College of Biomedical & Life Sciences, Cardiff University,  
10 4th Floor, Neuadd Meirionnydd, Heath Park, Cardiff, CF14 4YS, UK. [nollettcl@cardiff.ac.uk](mailto:nollettcl@cardiff.ac.uk) 02920  
11 687 187\*  
12  
13

14 Barbara Ryan, School of Optometry and Vision Sciences, Cardiff University, Cardiff, UK  
15  
16

17 Nathan Bray, Centre for Health Economics and Medicines Evaluation, Bangor University, Bangor, UK  
18  
19

20 Catey Bunce, School of Population Health and Environmental Sciences, King's College London,  
21 London, UK  
22  
23

24 Robin Casten, Department of Psychiatry and Human Behavior, Sidney Kimmel Medical College at  
25 Thomas Jefferson University, Philadelphia, USA  
26  
27

28 Rhiannon T. Edwards, Centre for Health Economics and Medicines Evaluation, Bangor University,  
29 Bangor, UK  
30  
31

32 David Gillespie, Centre for Trials Research, Cardiff University, Cardiff, UK  
33  
34

35 Daniel J. Smith, Institute of Health and Wellbeing, University of Glasgow, Glasgow, UK  
36  
37

38 Miles Stanford, Medical Eye Unit, St Thomas' Hospital, London, UK  
39  
40

41 Tom H. Margrain, School of Optometry and Vision Sciences, Cardiff University, Cardiff, UK  
42  
43

44 Word count: 4473 (exc title page, abstract, tables, footnotes and references)  
45  
46  
47  
48  
49  
50  
51  
52  
53  
54  
55  
56  
57  
58  
59  
60

\*Corresponding author

## ABSTRACT

**Objective:** To identify the risk factors for significant depressive symptoms in people with visual impairment in England and Wales to provide information on who is most at risk and to whom support services could be targeted in future.

**Design:** A cross-sectional study using baseline data from a pragmatic randomised controlled trial.

**Setting and Participants:** 990 participants aged 18 or over attending one of fourteen low vision rehabilitation primary care optometry based clinics in South Wales or two hospital clinics in London.

**Outcome measure:** A score of  $\geq 6$  on the Geriatric Depression Scale (GDS-15) was classed as clinically significant depressive symptoms.

**Results:** In a multivariable logistic regression model, significant depressive symptoms were associated with age (adjusted odds ratio (AOR) = 0.82, 95%CI: 0.66 to 0.90,  $p < 0.001$ ), ethnicity (AOR non-white compared to white = 1.72, 95%CI: 1.05 to 2.81,  $P = 0.031$ ), number of physical illnesses (AOR for one versus no illnesses = 1.28, 95%CI: 0.77 to 2.13; two versus no illnesses = 1.96, 95%CI: 1.14 to 3.37; three or more versus no illnesses = 1.68, 95%CI: 0.86 to 3.29,  $p = 0.051$ ), total number of eye conditions (AOR for two versus one condition = 0.98, 95%CI: 0.67 to 1.43; three or more versus one condition = 0.34, 95%CI: 0.15 to 0.75,  $p = 0.026$ ), self-reported health (AOR for excellent versus poor = 0.01, 95%CI: 0.00 to 0.12; very good versus poor = 0.06, 95%CI: 0.03 to 0.13; good versus poor = 0.14, 95%CI: 0.08 to 0.24; fair versus poor = 0.28, 95%CI: 0.18 to 0.46,  $p < 0.001$ ) and self-reported visual functioning (AOR = 1.45, 95%CI: 1.31 to 1.61,  $p < 0.001$ ).

**Conclusion:** Younger age, a non-white ethnicity, more physical illnesses, fewer eye conditions and poorer self-reported health and visual function are risk factors for significant depressive symptoms in this population.

**Trial registration:** ISRCTN46824140

## KEYWORDS

depression, vision impairment, sight loss, risk factor, depressive symptoms

## ARTICLE SUMMARY

### Strengths and Limitations of the Study

- This is the first study of risk factors for depressive symptoms in people seeking help for vision impairment in England and Wales.
- It benefits from a large sample size (n=990) and a high response rate (n=990/1323, 74.8%) which increase the generalisability of the findings.
- It examines factors which can be readily assessed by practitioners in primary care and general hospital clinics who come into contact with people with vision impairment, enabling them to be alerted to those most at risk and in need of signposting to support services.
- However, it excludes some more difficult to measure factors, such as vision specific distress, coping style and perceived social support, which may also predict depression in this population.
- The study uses a cross-sectional design so conclusions about direction of causality cannot be made.

## BACKGROUND

Vision impairment impacts on all aspects of life and is associated with reduced functional ability, falls, social isolation and reduced quality-of-life.<sup>1-3</sup> There is also a growing awareness that it has a negative impact on mental health status too. Population based studies provide robust evidence of an association between vision impairment and depression. Typically those with a vision impairment are 2 to 3 times more likely to be depressed.<sup>4, 5</sup> In Britain, for example, a large survey of >13,000 older adults found that the prevalence of significant depressive symptoms in those with good vision living in the community was about 4.6% while in those with a vision impairment (<6/18) it was 13.5%.<sup>5</sup>

The prevalence of significant depressive symptoms is also high in those accessing rehabilitation services. Results from a study in Australia found that when screened with the two item Patient Health Questionnaire (PHQ-2), 37% of patients attending rehabilitation clinics or eye care services screened positive for depressive symptoms.<sup>6</sup> Here in the UK, we screened over 1000 patients attending low vision rehabilitation appointments using the Geriatric Depression Scale (GDS-15), as part of the Depression in Visual Impairment Trial (DEPVIT), a randomised controlled trial.<sup>7</sup> We found that 43% of patients reported significant depressive symptoms (score  $\geq 6$ ) and, significantly, 74.8% were not receiving any treatment for depression.<sup>8</sup> This finding supports previous reports that people with a vision impairment are less likely to have their depression identified than those with good vision.<sup>9-11</sup>

Because depression goes under-detected in this patient group, there is a need to improve routine screening. The National Institute for Health and Care Excellence (NICE), in their guidelines on 'Depression in adults with a chronic physical health problem'<sup>12</sup> suggest that practitioners working in primary care and general hospital clinics should be aware that patients with a chronic physical health problem, especially those with functional impairment, are at a high risk of depression. They recommend being alert to possible depression and asking two simple screening questions to detect depression.<sup>12</sup> Those screening positively should be referred to an appropriate professional for assessment, in most cases, the patient's General Practitioner (GP). Screening should occur in both low vision specific settings such as rehabilitation clinics, and in primary care and general clinical settings such as diabetes or stroke clinics, where vision impairment is prevalent. In busy primary care and general clinics, understanding who is most at risk of depression amongst this patient group using easy to determine factors may help clinicians to target depression screening and signpost patients to supportive services.

Previous cross-sectional studies of patients from outpatient eye clinics and low vision rehabilitation services have identified several risk factors for depression including: being female, being relatively younger in age, living alone and having lower acceptance of vision loss<sup>13</sup>, reporting poorer self-reported health and having a history of mental health problems,<sup>13, 14</sup> reporting poorer vision specific functioning, higher levels of vision

1  
2  
3 specific distress, having an avoidant coping style and lower perceived adequacy of social support<sup>14</sup>. A  
4 longitudinal prospective cohort study of 540 patients from outpatient low vision organisations in the  
5 Netherlands and Belgium found that people who developed depressive symptoms over a two year period  
6 were more likely to be: living alone, having just enough money to cover their expenses, have macular  
7 degeneration, have problems with adaptation to vision loss, have reduced health related quality of life and  
8 be experiencing symptoms of anxiety.<sup>15</sup>  
9  
10  
11

12  
13 The above studies were conducted in the Netherlands, Belgium and Australia and we do not know if the  
14 same risk factors apply to a British population. Therefore, it is useful to examine the risk factors for  
15 depressive symptoms in people with sight loss in England and Wales, using a large sample of consecutive  
16 attendees to services. The findings will enable clinicians in primary care and general hospital clinics to  
17 allocate resources to screening those most at risk.  
18  
19  
20

21  
22 The aim of this study was to identify the risk factors for significant depressive symptoms in people with  
23 vision impairment attending rehabilitation clinics in England and Wales using baseline data from a  
24 randomised controlled trial of interventions for depression (DEPVIT).<sup>7</sup> We focused our examination mainly  
25 on characteristics which can be easily identified in routine practice for example, age and ethnicity, to provide  
26 a straightforward approach to identifying high risk patients based on readily available information.  
27  
28  
29  
30  
31

## 32 **METHODS**

### 33 **Study Design and Participants**

34  
35 This cross-sectional study was undertaken as part of the Depression in Visual Impairment Trial (DEPVIT).<sup>7</sup>  
36 Eligible participants were consecutive adult patients who were seeking help for vision impairment at  
37 specialist visual rehabilitation services taking part in DEPVIT. Fourteen primary care based rehabilitation  
38 services recruited participants in South Wales. Services were readily accessible high street practices,  
39 accepted self-referral and tended to cater to older adults with age-related eye conditions living in the local  
40 community. A secondary care rehabilitation clinic based at Guys and St Thomas' Hospital and an NHS  
41 outreach clinic providing low vision services in Southwark recruited participants from the London area.  
42 Access to these two specialist clinics was by referral only. All consecutive attendees aged 18 or over were  
43 considered eligible for the study, unless they lived outside the catchment area for the trial or if they had  
44 previously been screened for depression as part of the study (some people had more than one appointment  
45 during the length of the study, but we only wanted to screen them and invite them to take part once).  
46 Ethical approval was obtained from the NHS South East Wales Research Ethics Committee Panel B. All  
47  
48  
49  
50  
51  
52  
53  
54  
55  
56  
57  
58  
59  
60

1  
2  
3 participants provided written informed consent for their anonymised data to be used and the study adhered  
4 to the Declaration of Helsinki.  
5

### 6 **Funding and Public and Patient Involvement**

7  
8 The study was funded by Guide Dogs, a voluntary sector organisation who work closely with people with  
9 vision impairment and understand their experiences and preferences. They carried out a review prior to  
10 funding to ensure the research questions were relevant and the study design appropriate. Patients with a  
11 vision impairment reviewed and provided feedback on the depression questionnaire. Patients were not  
12 involved in the recruitment to or conduct of the study.  
13  
14  
15

### 16 **Measures**

#### 17 **Depression**

18  
19 The Geriatric Depression Scale (GDS-15)<sup>16</sup> is one of the most widely used instruments for the screening of  
20 depression in older adults. The questionnaire has 15 questions and completion time is approximately 5  
21 minutes. Possible scores range from 0 to 15, with higher scores indicating a greater number of depressive  
22 symptoms. We chose to use dichotomous categories rather than the continuous scale as this reflects the  
23 scale's use in clinical practice as a screening tool to identify those who warrant further investigation. We  
24 used the conventional scoring approach rather than Rasch analysis to facilitate direct comparison with  
25 published studies and to facilitate clinically valid results. A score of 6 or more was taken to be indicative of  
26 significant depressive symptoms<sup>5</sup>.  
27  
28  
29  
30  
31  
32  
33

#### 34 **Risk Factors**

35  
36 We recorded gender, age, ethnicity (White, Asian/Asian British, Black/Black British or Other), physical illness  
37 (number and type) and ocular diagnosis (number and type of eye conditions), factors which would be readily  
38 available to clinicians working with people with sight loss and have been considered in previous studies.  
39  
40  
41

42 We also measured self-reported general health as this has consistently been shown to be a risk factor for  
43 depression<sup>6, 13-15</sup> and can be easily measured using a single item question from the SF-12, "In general, would  
44 you say your overall health is: excellent, very good, good, fair or poor?". The question has had widespread  
45 use as a single-item measure, including in previous studies of visual impairment and depression<sup>5, 14</sup> and has  
46 shown to be significantly and independently associated with specific health problems, use of health services,  
47 changes in functional status, recovery from episodes of ill health, mortality, and sociodemographic  
48 characteristics of respondents.<sup>17</sup>  
49  
50  
51  
52  
53

54 To provide information on vision related factors for low vision practitioners who have access to this  
55 information, we also measured visual acuity (corrected binocular vision using ETDRS LogMAR) and recorded  
56  
57



1  
2  
3 time since vision loss in years. As previous studies have found no evidence of an association between  
4 objective measures of visual acuity and depression<sup>13-15</sup>, we were interested to see whether a subjective  
5 measure of visual function would be associated. Self-reported visual functioning was measured using the 7  
6 item National Eye Institute Visual Function Questionnaire (NEI-VFQ 7) which includes a subset of questions  
7 from the National Eye Institute Visual Function Questionnaire that have previously been shown to be  
8 responsive to rehabilitation service intervention.<sup>18</sup> As the NEI-VFQ 7 is commonly reported in the published  
9 literature with Rasch analysis, we transformed the Likert responses using the Rasch derived scoring key  
10 provided by Ryan et al (2008)<sup>18</sup> to calculate a score for each completed questionnaire. Questionnaires with 3  
11 or more missing items were counted as missing and excluded from the analysis.  
12  
13  
14  
15  
16

### 17 **Procedures**

18  
19  
20 Participants who were eligible to take part in the study were sent a questionnaire in large print format  
21 containing the GDS-15, NEI-VFQ 7 and single-item question about health, along with their appointment  
22 letter at least one week before their low vision assessment. They were asked to complete the questionnaire  
23 at home, with assistance if needed, and to bring it along to their appointment. Those who did not return a  
24 completed questionnaire were given the opportunity to complete another copy at the clinic, before their  
25 appointment. The low vision practitioner reviewed the participant's responses with them at the start of the  
26 assessment and asked for their written consent to use their anonymised responses in the study. For those  
27 who consented, information on gender, date of birth, ethnicity, physical illness, primary ocular diagnosis,  
28 corrected ETDRS Log MAR acuity and time since vision loss first identified were recorded on a Case Report  
29 Form (CRF). Those who screened positive for depressive symptoms (GDS-15 score of  $\geq 6$ ) were offered entry  
30 to the DEPVIT trial if eligible, or a referral to their GP if not eligible.<sup>19</sup>  
31  
32  
33  
34  
35  
36  
37

38 Case Report Forms completed by the clinicians were sent to the research coordinating centre at Cardiff  
39 University by secure FAX where the validity and completeness of the data was checked. Any missing or out  
40 of range data were queried with the practitioner and checked with clinical notes. Five percent of all CRFs and  
41 surveys were double entered. The error rate was less than 2% and identified errors were corrected. The  
42 number of eligible patients who did not complete the survey and the number who did not consent for their  
43 data to be used for research purposes were also recorded. The final dataset was then locked and transferred  
44 to the statistical team for analysis. The descriptive statistics were tabulated using SPSS Version 23 and the  
45 regression models were fitted using STATA Version 13.1.  
46  
47  
48  
49  
50

### 51 **Statistical analysis**

52  
53 Participant characteristics were summarised for those with significant depressive symptoms (GDS-15  $\geq 6$ ) and  
54 those without (GDS-15  $< 6$ ). Categorical variables were summarised as numbers and percentages and  
55  
56  
57

1  
2  
3 continuous variables as medians with interquartile ranges. In all cases we report the number of participants  
4 for whom data was missing.  
5

6  
7 Where the GDS-15 was not fully completed, completed answers were totalled to give a final score provided  
8 that the number of questions not answered was 2 or less<sup>5</sup>. If 3 or more questions were unanswered, the  
9 GDS-15 data were regarded as missing and the participant excluded from the analysis.  
10

11  
12 Logistic regression was used to determine the independent relationship between each of the potential risk  
13 factors and significant depressive symptoms. The potential risk factors were initially included individually  
14 (univariable analysis) and then entered into a multivariable logistic regression analyses in blocks to  
15 determine which variables remain associated with significant depressive symptoms after controlling for the  
16 other factors. The events-per-variable was sufficient to allow inclusion of all potential risk factors, so no  
17 selection was required.<sup>20</sup> However, due to co-linearity, it was not possible to include both number and type  
18 of physical illnesses or both number and type of eye conditions. Therefore, a decision was made to include  
19 only number of illnesses and eye conditions, as it was hypothesized that burden of multiple diagnoses would  
20 be more important than type of diagnosis: those with multiple morbidity are at twice the risk of depression  
21 than those without multiple morbidity.<sup>21</sup> The variables were entered into the analysis in blocks, starting with  
22 the risk factors which could be most easily identified in routine clinics, and ending with those requiring more  
23 time or adaptation to practice to assess. The blocks were: 1) Demographics (gender/age/ethnicity), 2)  
24 Demographics and Physical Health (number of illnesses), 3) Demographics, Physical health and Eye health  
25 (number of eye conditions/visual acuity/time since vision loss), 4) Demographics, Physical Health, Eye health  
26 and Self-report measures (self-report health/visual functioning). We calculated the area under the ROC  
27 curve to quantify the overall ability of each (additional) block of variables to correctly discriminate between  
28 those with and without depression.  
29  
30  
31  
32  
33  
34  
35  
36  
37  
38  
39  
40  
41

## 42 **RESULTS**

43  
44 A total of 1323 consecutive adult patients attended the low vision rehabilitation clinics during the 30 month  
45 recruitment period. Of these, 312 were not screened for depression because the practitioner felt it was  
46 inappropriate at the time (because the patient was too ill, had dementia or was recently bereaved); or the  
47 patient had forgotten to complete the questionnaire and there was no time at the assessment; or they did  
48 not consent for their data to be used for research. An additional 21 patients had 3 or more missing items on  
49 the GDS-15 and were excluded, leaving a final sample size of 990 and a complete response rate of 74.8%.  
50 The median age of the participants was 79.0 years (IQR= 66.0 to 85.0), 62.2% were female (n=616) and 85%  
51 were white (n= 842). The overall prevalence of significant depressive symptoms was 42.5%. This varies very  
52  
53  
54  
55  
56  
57

1  
2  
3 slightly from our previously reported study (43%)<sup>8</sup> due to the methodology used in this study to calculate the  
4 total GDS-15 score (excluding those with  $\geq 3$  missing items).  
5  
6

7  
8 Tables 1-4. outline the demographics characteristics of the participants, their physical health measures, eye  
9 health measures and self-report health and vision measures respectively, split by those with and without  
10 significant depressive symptoms.  
11

| Demographic Characteristics | GDS-15 Score <6   | GDS-15 Score $\geq 6$ | Total             |
|-----------------------------|-------------------|-----------------------|-------------------|
| Total Sample, n (%)         | 569 (57.5%)       | 421 (42.5%)           | 990 (100%)        |
| Gender, n (%)               |                   |                       |                   |
| Male                        | 201 (53.7%)       | 173 (46.3%)           | 374 (100%)        |
| Female                      | 368 (59.7%)       | 248 (40.3%)           | 616 (100%)        |
| Data missing                | 0                 | 0                     | 0                 |
| Age (years), Median (IQR)   | 80.0 (72.0, 86.0) | 77.0 (57.0, 85.0)     | 79.0 (66.0, 85.0) |
| Data missing, n (%)         | 22 (52.4%)        | 20 (47.6%)            | 42 (100%)         |
| Ethnicity, n (%)            |                   |                       |                   |
| White                       | 508 (60.3%)       | 334 (39.7%)           | 842 (100%)        |
| Asian/Asian/British         | 12 (52.2%)        | 11 (47.8%)            | 23 (100%)         |
| Black/Black British         | 40 (38.5%)        | 64 (61.5%)            | 104 (100%)        |

|                                         |             |             |            |
|-----------------------------------------|-------------|-------------|------------|
| Other ethnic group                      | 9 (45%)     | 11 (55%)    | 20 (100%)  |
| Data missing                            | 0 (0%)      | 1 (100%)    | 1 (100%)   |
| Ethnicity (collapsed categories), n (%) |             |             |            |
| White                                   | 508 (60.3%) | 334 (39.7%) | 842 (100%) |
| Non-White                               | 61 (41.5%)  | 86 (58.5%)  | 147 (100%) |
| Data missing                            | 0 (0%)      | 1 (100%)    | 1 (100%)   |

*Table 1. Summarises the demographic characteristics of those with and without significant depressive symptoms*

For peer review only

Table 2. Summarises the physical health of those with and without significant depressive symptoms

| Physical health                                                  | GDS-15 Score <6 | GDS-15 Score ≥6 | Total      |
|------------------------------------------------------------------|-----------------|-----------------|------------|
| Physical Illnesses, n (%)*                                       |                 |                 |            |
| Diabetes                                                         | 119 (47.8%)     | 130 (52.2%)     | 249 (100%) |
| Epilepsy                                                         | 8 (57.1%)       | 6 (42.9%)       | 14 (100%)  |
| Stroke                                                           | 31 (50.8%)      | 30 (49.2%)      | 61 (100%)  |
| Thyroid                                                          | 27 (47.4%)      | 30 (52.6%)      | 57 (100%)  |
| Heart Disease                                                    | 94 (50.3%)      | 93 (49.7%)      | 187 (100%) |
| High Blood Pressure                                              | 246 (55.5%)     | 197 (44.5%)     | 443 (100%) |
| Respiratory Disease                                              | 48 (59.3%)      | 33 (40.7%)      | 81 (100%)  |
| Other                                                            | 113 (48.9%)     | 118 (51.1%)     | 231 (100%) |
| No medical illness                                               | 113 (70.2%)     | 48 (29.8%)      | 161 (100%) |
| Data missing                                                     | 4 (100%)        | 0 (0%)          | 4 (100%)   |
| Total number of physical illnesses, n (%)                        |                 |                 |            |
| 0                                                                | 113 (70.2%)     | 48 (29.8%)      | 161 (100%) |
| 1                                                                | 277 (60.6%)     | 180 (39.4%)     | 457 (100%) |
| 2                                                                | 127 (48.3%)     | 136 (51.7%)     | 263 (100%) |
| 3                                                                | 41 (47.7%)      | 45 (52.3%)      | 86 (100%)  |
| 4                                                                | 4 (28.6%)       | 10 (71.4%)      | 14 (100%)  |
| 5                                                                | 2 (50%)         | 2 (50%)         | 4 (100%)   |
| 6                                                                | 1 (100%)        | 0 (0%)          | 1 (100%)   |
| Data missing                                                     | 4 (100%)        | 0 (0%)          | 4 (100%)   |
| Total number of physical illnesses (collapsed categories), n (%) |                 |                 |            |
| 0                                                                | 113 (70.2%)     | 48 (29.8%)      | 161 (100%) |
| 1                                                                | 277 (60.6%)     | 180 (39.4%)     | 457 (100%) |
| 2                                                                | 127 (48.3%)     | 136 (51.7%)     | 263 (100%) |
| 3 or more                                                        | 48 (45.7%)      | 57 (54.3%)      | 105 (100%) |
| Data missing                                                     | 4 (100%)        | 0 (0%)          | 4 (100%)   |

\* Participants may have had more than one physical illness

Table 3. Summarises the eye health of those with and without significant depressive symptoms

| Eye health                                                   | GDS-15 Score <6   | GDS-15 Score ≥6   | Total            |
|--------------------------------------------------------------|-------------------|-------------------|------------------|
| Ocular Diagnosis, n (%)*                                     |                   |                   |                  |
| AMD wet                                                      | 117 (59.4%)       | 80 (40.6%)        | 197 (100%)       |
| AMD dry                                                      | 259 (64.6%)       | 142 (35.4%)       | 401 (100%)       |
| Glaucoma                                                     | 104 (63.0%)       | 61 (37%)          | 165 (100%)       |
| Cataract                                                     | 95 (70.4%)        | 40 (29.6%)        | 135 (100%)       |
| Diabetic eye disease                                         | 59 (48.0%)        | 64 (52.0%)        | 123 (100%)       |
| Other eye condition                                          | 157 (47.9%)       | 171 (52.1%)       | 328 (100%)       |
| Data missing                                                 | 1 (50%)           | 1 (50%)           | 2 (100%)         |
| Total number of eye conditions, n (%)                        |                   |                   |                  |
| 1                                                            | 381 (56%)         | 299 (44.0%)       | 680 (100%)       |
| 2                                                            | 153 (58.8%)       | 107 (41.2%)       | 260 (100%)       |
| 3                                                            | 32 (72.7%)        | 12 (27.3%)        | 44 (100%)        |
| 4                                                            | 2 (66.7%)         | 1 (33.3%)         | 3 (100%)         |
| 5                                                            | 0 (0%)            | 1 (100%)          | 1 (100%)         |
| Data missing                                                 | 1 (50%)           | 1 (50%)           | 2 (100%)         |
| Total number of eye conditions (collapsed categories), n (%) |                   |                   |                  |
| 1                                                            | 381 (56.0%)       | 299 (44.0%)       | 680 (100%)       |
| 2                                                            | 153 (58.8%)       | 107 (41.2%)       | 260 (100%)       |
| 3 or more                                                    | 34 (70.8%)        | 14 (29.2%)        | 48 (100%)        |
| Data missing                                                 | 1 (50%)           | 1 (50%)           | 2 (100%)         |
| Corrected binocular visual acuity (logMar), Median (IQR)     | 0.60 (0.40, 0.94) | 0.70 (0.50, 1.00) | 0.67 (0.40, 1.0) |
| Data missing, n (%)                                          | 0                 | 0                 | 0                |
| Years since vision loss, Median (IQR)                        | 5.5 (2.2, 12.0)   | 5.0 (2.1, 10.2)   | 5.2 (2.2, 11.1)  |
| Data missing, n (%)                                          | 13 (81.25%)       | 3 (18.75%)        | 16 (100%)        |

\* Participants may have had more than one ocular diagnosis

Table 4. Summarises the self-reported health and visual function of those with and without significant depressive symptoms

| Self-report measures                         | GDS-15 Score <6    | GDS-15 Score ≥6   | Total              |
|----------------------------------------------|--------------------|-------------------|--------------------|
| Self-rated health(SF-12), n (%)              |                    |                   |                    |
| Excellent                                    | 22 (95.7%)         | 1 (4.3%)          | 23 (100%)          |
| Very Good                                    | 93 (86.1%)         | 15 (13.9%)        | 108 (100%)         |
| Good                                         | 201 (72.6%)        | 76 (27.4%)        | 277 (100%)         |
| Fair                                         | 192 (52.5%)        | 174 (47.5%)       | 366 (100%)         |
| Poor                                         | 33 (18.5%)         | 145 (81.5%)       | 178 (100%)         |
| Data Missing                                 | 28 (73.7%)         | 10 (26.3%)        | 38 (100%)          |
| Visual functioning (NEI VFQ-7), Median (IQR) | 0.23 (-1.43, 1.46) | 1.41 (0.17, 2.49) | 0.78 (-0.80, 1.91) |
| Data missing n (%)                           | 23 (67.6%)         | 11 (32.4%)        | 34 (100%)          |

1  
2  
3  
4 The variables ethnicity, number of physical illnesses and number of eye conditions had a small number of  
5 participants in some categories, hence the categories were collapsed before being entered into the  
6 regression analysis. Both the original and collapsed categories are presented in the tables. Table 5.  
7 Summarises the results of the univariable and multivariable logistic regression using odds ratios (OR) and  
8 adjusted odds ratios (AOR) and presented with 95% confidence intervals (CI) and p values.  
9  
10  
11  
12  
13  
14  
15  
16  
17  
18  
19  
20  
21  
22  
23  
24  
25  
26  
27  
28  
29  
30  
31  
32  
33  
34  
35  
36  
37  
38  
39  
40  
41  
42  
43  
44  
45  
46  
47  
48  
49  
50  
51  
52  
53  
54  
55  
56  
57  
58  
59  
60

For peer review only

1

| Block                       | Characteristic                                          | Univariable |              |              |        | Multivariable Block 1<br>N=947 |              |        | Multivariable Block 2<br>N=943 |              |        | Multivariable Block 3<br>N=926 |              |        | Multivariable Block 4<br>N=877 |              |        |
|-----------------------------|---------------------------------------------------------|-------------|--------------|--------------|--------|--------------------------------|--------------|--------|--------------------------------|--------------|--------|--------------------------------|--------------|--------|--------------------------------|--------------|--------|
|                             |                                                         | N           | OR           | 95% CI       | P      | AOR                            | 95% CI       | P      |
| 1. Demographics             | <b>Gender: Reference category male</b>                  |             |              |              |        |                                |              |        |                                |              |        |                                |              |        |                                |              |        |
|                             | • Female                                                | 990         | 0.78         | 0.60 to 1.01 | 0.064  | 0.87                           | 0.66 to 1.14 | 0.311  | 0.89                           | 0.67 to 1.17 | 0.390  | 0.90                           | 0.68 to 1.19 | 0.462  | 0.85                           | 0.61 to 1.19 | 0.350  |
|                             | <b>Age (per decade)</b>                                 | 948         | 0.82         | 0.74 to 0.90 | <0.001 | 0.82                           | 0.82 to 0.90 | <0.001 | 0.82                           | 0.74 to 0.90 | <0.001 | 0.82                           | 0.74 to 0.90 | <0.001 | 0.82                           | 0.66 to 0.90 | <0.001 |
|                             | <b>Ethnicity: Reference category white</b>              |             |              |              |        |                                |              |        |                                |              |        |                                |              |        |                                |              |        |
|                             | • Non-white                                             | 989         | 2.14         | 1.50 to 3.06 | <0.001 | 1.54                           | 1.05 to 2.27 | 0.027  | 1.64                           | 1.10 to 2.43 | 0.014  | 1.61                           | 1.08 to 2.40 | 0.020  | 1.72                           | 1.05 to 2.81 | 0.031  |
| 2. Physical Health          | <b>Total illnesses: Reference category 0 illness</b>    |             |              |              |        |                                |              |        |                                |              |        |                                |              |        |                                |              |        |
|                             | • 1 illness                                             | 986         | 1.53         | 1.04 to 2.25 | <0.001 |                                |              |        | 2.06                           | 1.34 to 3.18 | <0.001 | 2.09                           | 1.36 to 3.24 | <0.001 | 1.28                           | 0.77 to 2.13 | 0.051  |
|                             | • 2 illnesses                                           |             | 2.52         | 1.66 to 3.82 |        |                                |              |        | 3.55                           | 2.23 to 5.65 |        | 3.62                           | 2.26 to 5.78 |        | 1.96                           | 1.14 to 3.37 |        |
|                             | • 3 + illnesses                                         |             | 2.80         | 1.68 to 4.66 |        |                                |              |        | 3.91                           | 2.24 to 6.82 |        | 4.02                           | 2.27 to 7.11 |        | 1.68                           | 0.86 to 3.29 |        |
| 3. Eye Health               | <b>Total eye conditions: Reference category 1 cond.</b> |             |              |              |        |                                |              |        |                                |              |        |                                |              |        |                                |              |        |
|                             | • 2 conditions                                          | 988         | 0.89         | 0.67 to 1.19 | 0.123  |                                |              |        | 0.91                           | 0.66 to 1.27 | 0.114  | 0.98                           | 0.67 to 1.43 | 0.026  |                                |              |        |
|                             | • 3 + conds.                                            |             | 0.52         | 0.28 to 1.00 |        |                                |              |        | 0.48                           | 0.24 to 0.96 |        | 0.34                           | 0.15 to 0.75 |        |                                |              |        |
|                             | <b>Visual acuity</b>                                    | 990         | 1.01         | 0.99 to 1.03 | 0.568  |                                |              |        | 1.00                           | 0.98 to 1.03 | 0.929  | 1.00                           | 0.97 to 1.03 | 0.942  |                                |              |        |
|                             | <b>Time since vision loss (per year)</b>                | 974         | 0.99         | 0.99 to 1.01 | 0.818  |                                |              |        | 0.99                           | 0.98 to 1.00 | 0.075  | 0.99                           | 0.98 to 1.00 | 0.244  |                                |              |        |
| 4. Self-report Measures     | <b>Subjective Health: Reference category poor</b>       |             |              |              |        |                                |              |        |                                |              |        |                                |              |        |                                |              |        |
|                             | • Excellent                                             | 952         | 0.01         | 0.00 to 0.08 | <0.001 |                                |              |        |                                |              |        | 0.01                           | 0.00 to 0.12 | <0.001 |                                |              |        |
|                             | • Very Good                                             |             | 0.04         | 0.02 to 0.07 |        |                                |              |        | 0.06                           | 0.03 to 0.13 |        |                                |              |        |                                |              |        |
|                             | • Good                                                  |             | 0.09         | 0.05 to 0.14 |        |                                |              |        | 0.14                           | 0.08 to 0.24 |        |                                |              |        |                                |              |        |
|                             | • Fair                                                  |             | 0.21         | 0.13 to 0.32 |        |                                |              |        | 0.28                           | 0.18 to 0.46 |        |                                |              |        |                                |              |        |
| <b>Visual Functioning</b>   | 956                                                     | 1.48        | 1.36 to 1.60 | <0.001       |        |                                |              | 1.45   | 1.31 to 1.61                   | <0.001       |        |                                |              |        |                                |              |        |
| <b>Area Under ROC Curve</b> |                                                         |             |              |              | 0.59   |                                |              | 0.65   |                                |              | 0.65   |                                |              | 0.81   |                                |              |        |

43

44

45

46

47



1  
2  
3  
4  
5  
6  
7  
8  
9  
10  
11  
12  
13  
14  
15  
16  
17  
18  
19  
20  
21  
22  
23  
24  
25  
26  
27  
28  
29  
30  
31  
32  
33  
34  
35  
36  
37  
38  
39  
40  
41  
42  
43  
44  
45  
46  
47

*Table 5. Summaries the results of the univariable logistic regression and multivariable regression analyses, with blocks of variables added sequentially to the model.*

For peer review only

### Demographics

Table 1. Shows that those with a higher prevalence of significant depressive symptoms were male, younger or non-white. In the univariable analysis, age and ethnicity were associated with significant depressive symptoms. An increase in age was associated with lower odds of participants having depression and having ethnicity other than white was associated with higher odds of having depression (see Table 5.). These variables remain associated once other variables were controlled for in the multivariable analysis final model. There was no evidence of an association between gender and significant depressive symptoms.

### Physical health

The prevalence of depression was lowest in those with no physical illness (29.8%) and highest in those with three or more illnesses (54.3% - Table 2.). In the univariable analysis, an increase in the number of physical illnesses was associated with higher odds of having significant depressive symptoms and this association remained in the multivariable final model.

### Eye health

Those with a higher prevalence of depression had one eye condition, worse visual acuity or less time since vision loss (Table 3.). The univariable analysis found no evidence of an association between significant depressive symptoms and number of eye conditions, visual acuity and time since vision loss. However, when controlling for other factors in the final model, an increase in the number of eye conditions was associated with lower odds of having depression.

### Self-report measures

The prevalence of depression was highest in those with poor self-rated health (81.5%) and lowest in those with excellent health (4.3%). Those with depression had worse self-rated visual functioning (Table 4.). Worse self-rated health and visual functioning were associated with higher odds of having significant depressive symptoms in both the univariable analysis and multivariable final model.

The area under the ROC curve was 0.59 when demographics alone were entered into the model, increasing to 0.65 when physical and eye health variables were considered, and reaching 0.81 when self-report measures were added.

## DISCUSSION

This study identified the risk factors for significant depressive symptoms in people with vision impairment attending vision rehabilitation clinics in England and Wales. We focused mainly on risk factors which can be easily identified in primary care and general hospital clinics, so as to provide a pragmatic approach to identifying high risk patients. To inform ophthalmic clinicians who may have access to more detailed information on eye health, we also included a range of vision related variables. Our findings showed that amongst older adults, those of relatively younger age, with an ethnicity other than white, poorer physical health and poorer self-reported health and visual function had higher odds of having significant depressive symptoms. The number of eye conditions was not an independent predictor of depressive symptoms, but was related to depression when other variables were controlled: less number of eye conditions was associated with higher odds. There was no evidence that gender, time since vision loss and visual acuity were associated with depression.

With regard to demographic factors, our findings demonstrate some support for, and discrepancies with, previous studies. Whilst some studies have shown that age is not a predictor<sup>14, 15</sup>, one recently demonstrated, as did ours, that relatively younger age was a risk factor for depression<sup>13</sup>. This perhaps reflects the finding in the general population that people aged 40–59 years have higher rates of depression than those aged  $\geq 60$  years<sup>22</sup> and those in middle-age have the highest risk<sup>23</sup>. The reasons for this are not clearly understood, but one theory is that by mid-life, individuals have learnt to adapt to their strengths and weaknesses, and in mid-life 'quell their infeasible aspirations'<sup>23</sup>. In those with vision loss, being affected in middle-age rather than old age may add to this sense of lost aspirations and could also result in more restriction in life including difficulties in finding and staying in work, playing sport etc. We included participants aged 18 and over whereas other studies included only older participants which may explain differences in findings between this and some other studies. We found that having an ethnicity other than white was a risk factor. Recent studies on vision impairment and depression have not measured ethnicity, however an earlier study conducted in New Zealand found that ethnicity was not related to depression<sup>24</sup>. Differences between that study and ours may be due to the different populations, with a wider variation in ethnicities in the UK and London in particular. The New Zealand study only recorded 'New Zealand born European' or 'other'. Therefore, future studies should include ethnicity as a variable to provide further clarification.

There is more consistency between studies in terms of health. We demonstrated that those with poorer self-reported health were at much higher risk of depressive symptoms. This confirms previous research in vision impaired people which has shown that poorer perceived health status<sup>13</sup>, poorer self-reported health<sup>14</sup> and poorer health related quality of life<sup>24</sup> are all predictors of depression. This is not surprising as patients may

1  
2  
3 include their emotional health in a question about general health. Our study also found that a higher  
4 number of physical illnesses was a risk factor for depression. This is in line with findings from the non-vision  
5 impaired population. A recent meta-analysis found a substantial relationship between multimorbidity (the  
6 presence of two or more chronic physical illnesses) and depression, reporting that people with  
7 multimorbidity are at twice the risk of depression to those without multimorbidity, and nearly three times at  
8 risk compared to those with no chronic physical condition<sup>21</sup>. The authors suggest the relationship is bi-  
9 directional and cite the Activity Restriction Model of Depressed Affect<sup>25</sup> which explains that multimorbidity  
10 contributes significantly to depressive symptoms through having to give up valued activities due to physical  
11 limitations. In our sample, the limitations of conditions such as stroke and diabetes may have compounded  
12 any mobility and functional issues already caused by sight loss, which can make self-care, engaging in  
13 hobbies and getting out and about more difficult.  
14  
15  
16  
17  
18  
19

20  
21 In terms of vision related factors, it is logical to assume that the chances of having depressive symptoms  
22 increases as visual acuity decreases. However, in line with other studies<sup>13-15</sup>, the results of the regression  
23 analysis do not support this hypothesis. What seems to be more important is self-reported visual function:  
24 those with worse self-reported visual function are more at risk of depressive symptoms. Therefore clinicians  
25 should take care not to make assumptions about the likelihood of depression in only those with the lowest  
26 levels of vision as assessed by visual acuity. The relationship is likely to be bidirectional, with poorer visual  
27 function leading to loss of valued activities and mood, whilst lowered mood may influence a person's  
28 perception of their vision function. As with previous studies<sup>13, 15</sup>, time since the vision loss was first identified  
29 was also not a predictor of depression, indicating that patients may develop symptoms at any point on their  
30 sight loss journey.  
31  
32  
33  
34  
35  
36

37 This research added to the literature by examining risk factors in a British sample of people with vision  
38 impairment. The study benefited from a large sample size and a high response rate, enhancing the  
39 generalisability of the findings. As we included primary and secondary care low vision rehabilitation clinics,  
40 we believe the findings are transferrable to both settings. Our study employed validated measures of  
41 depressive symptoms and incorporated risk factors which are easy to identify in primary care and hospital  
42 clinics. Therefore the results can be easily integrated in clinical practice to target screening.  
43  
44  
45  
46

47 However, inevitably there were some value judgements in how we chose our criteria for selecting the range  
48 of potential factors in our study. This means that other parameters which have previously been shown to be  
49 predictors of depression, for example, vision specific distress, lower perceived adequacy of social support  
50 and avoidant coping<sup>14</sup>, were not measured and therefore cannot be included in the risk profile advice to  
51 clinicians. These parameters can only be assessed using additional questionnaires which would have  
52  
53  
54  
55  
56  
57

1  
2  
3 increased the overall response burden in the study and furthermore, it is unlikely that these variables would  
4 be measured in routine practice and therefore were not within the scope of our study.  
5

6 We chose to dichotomise the GDS-15 to reflect how it would be used in practice, as a screening tool for  
7 identifying patients who would benefit from screening in clinic and potentially signposting to support  
8 services. However, we acknowledge that this may have led to a reduction in power and loss of  
9 information.<sup>26</sup> A further limitation of the study is the use of a cross-sectional design, which means  
10 conclusions about direction of causality are not possible. Finally, a number of patients were not screened at  
11 the discretion of the practitioners, including because they felt the patient was too ill, had dementia or had  
12 recently been bereaved. Given that these significant life events are associated with depression<sup>27</sup> and we  
13 have shown physical health to be a risk factor for depression, it is quite possible that our estimate of the  
14 prevalence of depressive symptoms is a conservative one.  
15  
16  
17  
18  
19  
20

21 For the first time, for a population in England and Wales, our study demonstrates that for patients with  
22 vision impairment, there are several risk factors for depression which can be easily identified by those  
23 coming in to contact with people with sight loss. We recommend that all clinicians working with people with  
24 sight loss are alert to these factors. We advise screening higher risk patients using the simple two question  
25 screen recommended in the NICE guidelines<sup>12</sup>. If a patient is identified as having likely depression they  
26 should be managed according to the guidelines, which includes referral to an appropriate professional, for  
27 example, the GP. Local pathways should be established to manage this referral. However, because the  
28 prevalence of depressive symptoms is so high in low vision clinics, we recommend that low vision  
29 practitioners introduce depression screening as part of routine care with all patients.  
30  
31  
32  
33  
34  
35

36 Future research could include qualitative work to clarify the pathway from the risk factors identified here to  
37 the onset of depression, to aid the development of interventions for depression in this population.  
38  
39

#### 40 **ACKNOWLEDGEMENTS**

41  
42 The authors wish to thank the following for data collection: Sandra Jumbe, Rowanne Black, Kathy Davies,  
43 Denise Banford, Ian Cousins, Huw Bellamy, Norma Davies, Ceri Goodman, Sharon Beatty, Lisa Evans,  
44 Leighton Griffiths, Matthew Harvey, David Jenkins, Jane Savage, Marek Karas, John Butler, Seema Rajoria,  
45 Rajiv Raja, Jane De Courcy, Ahalya Subramanian, Sonal Rughani and Sarah Janikoun.  
46  
47  
48

#### 49 **FOOTNOTES**

50  
51 **Contributors:** TM, DS, RTE and MS conceived the idea for the study and acquired funding. CN project  
52 managed the study, supervised data collection, performed data cleaning, statistical analysis and wrote the  
53 first draft of the manuscript. CB and BR substantially contributed to the design of the study and to the  
54 acquisition of data. NB and RC contributed to the design of the study. DG provided statistical advice and  
55  
56  
57

1  
2  
3 supervision. All authors contributed to the design of the protocol, critically reviewed the manuscript for  
4 important intellectual content and approved the final manuscript.  
5

6  
7 **Funding:** The work was supported by Guide Dogs grant number OR2009-07b.

8  
9 **Competing interests:** None declared.

10  
11 **Patient consent:** Not required – no identifiable information from a living individual included.

12  
13 **Ethics approval:** The NHS South East Wales Research Ethics Committee Panel B approved this study.

14  
15 **Data sharing statement:** There is no additional unpublished data from this study.  
16  
17

## 18 19 REFERENCES

- 20  
21 1. Christ SL, Zheng DD, Swenor BK, et al. Longitudinal relationships among visual acuity, daily functional  
22 status, and mortality: the Salisbury Eye Evaluation Study. *JAMA Ophthalmol* 2014;**132**(12):1400-6.
- 23 2. Court H, McLean G, Guthrie B, et al. Visual impairment is associated with physical and mental  
24 comorbidities in older adults: a cross-sectional study. *BMC Med* 2014;**12**:181.
- 25 3. Dargent-Molina P, Favier F, Grandjean H, et al. Fall-related factors and risk of hip fracture: the EPIDOS  
26 prospective study. *Lancet* 1996;**348**(9021):145-9.
- 27 4. Chou KL. Combined effect of vision and hearing impairment on depression in older adults: evidence from  
28 the English Longitudinal Study of Ageing. *J Affect Disord* 2008;**106**(1-2):191-6.
- 29 5. Evans JR, Fletcher AE, Wormald RP. Depression and anxiety in visually impaired older people.  
30 *Ophthalmology* 2007;**114**(2):283-8.
- 31 6. Holloway EE, Sturrock BA, Lamoureux EL, et al. Depression screening among older adults attending low-  
32 vision rehabilitation and eye-care services: Characteristics of those who screen positive and client  
33 acceptability of screening. *Australas J Ageing* 2015;**34**(4):229-34.
- 34 7. Nollett CL, Bray N, Bunce C, et al. Depression in Visual Impairment Trial (DEPVIT): A Randomized Clinical  
35 Trial of Depression Treatments in People With Low Vision. *Invest Ophthalmol Vis Sci*  
36 2016;**57**(10):4247-54.
- 37 8. Nollett CL, Bray N, Bunce C, et al. High Prevalence of Untreated Depression in Patients Accessing Low-  
38 Vision Services. *Ophthalmology* 2016;**123**(2):440-1.
- 39 9. Crawford MJ, Prince M, Menezes P, et al. The recognition and treatment of depression in older people in  
40 primary care. *Int J Geriatr Psychiatry* 1998;**13**(3):172-6.
- 41 10. MacDonald AJ. Do general practitioners "miss" depression in elderly patients? *Br Med J (Clin Res Ed)*  
42 1986;**292**(6532):1365-7.
- 43 11. O'Connor DW, Rosewarne R, Bruce A. Depression in primary care. 2: general practitioners' recognition of  
44 major depression in elderly patients. *Int Psychogeriatr* 2001;**13**(3):367-74.
- 45 12. National Institute for Health and Care Excellence. Depression in adults with a chronic physical health  
46 problem: recognition and management. Clinical guideline [CG91]. 2009.
- 47 13. van der Aa HP, Xie J, Rees G, et al. Validated Prediction Model of Depression in Visually Impaired Older  
48 Adults. *Ophthalmology* 2016;**123**(5):1164-6.
- 49 14. Rees G, Xie J, Holloway EE, et al. Identifying distinct risk factors for vision-specific distress and depressive  
50 symptoms in people with vision impairment. *Invest Ophthalmol Vis Sci* 2013;**54**(12):7431-8.
- 51 15. Heesterbeek TJ, van der Aa HPA, van Rens G, et al. The incidence and predictors of depressive and  
52 anxiety symptoms in older adults with vision impairment: a longitudinal prospective cohort study.  
53 *Ophthalmic Physiol Opt* 2017;**37**(4):385-98.  
54  
55  
56  
57

16. Sheikh JI, Yesavage JA. Geriatric Depression Scale (GDS): Recent evidence and development of a shorter version. *Clinical Gerontologist: The Journal of Aging and Mental Health* 1986;**5**(1-2):165-73.
17. Bowling A. Just one question: If one question works, why ask several? *J Epidemiol Community Health* 2005;**59**(5):342-5.
18. Ryan B, Court H, Margrain TH. Measuring low vision service outcomes: Rasch analysis of the seven-item National Eye Institute Visual Function Questionnaire. *Optom Vis Sci* 2008;**85**(2):112-21.
19. Margrain TH, Nollett C, Shearn J, et al. The Depression in Visual Impairment Trial (DEPVIT): trial design and protocol. *BMC Psychiatry* 2012;**12**:57.
20. Heinze G, Wallisch C, Dunkler D. Variable selection - A review and recommendations for the practicing statistician. *Biometrical Journal* 2018;**60**(3):431-49.
21. Read JR, Sharpe L, Modini M, et al. Multimorbidity and depression: A systematic review and meta-analysis. *Journal of Affective Disorders* 2017;**221**:36-46.
22. Centre for Disease Control and Prevention. QuickStats: Prevalence of Current Depression\* Among Persons Aged  $\geq 12$  Years, by Age Group and Sex — United States, National Health and Nutrition Examination Survey, 2007–2010. Secondary QuickStats: Prevalence of Current Depression\* Among Persons Aged  $\geq 12$  Years, by Age Group and Sex — United States, National Health and Nutrition Examination Survey, 2007–2010. 2012. <https://www.cdc.gov/mmwr/preview/mmwrhtml/mm6051a7.htm>. Accessed 21st June 2018.
23. Blanchflower DG, Oswald AJ. Is well-being U-shaped over the life cycle? *Social Science & Medicine* 2008;**66**(8):1733-49.
24. Hayman KJ, Kerse NM, La Grow SJ, et al. Depression in older people: visual impairment and subjective ratings of health. *Optom Vis Sci* 2007;**84**(11):1024-30.
25. Williamson G, Shaffer D. The Activity restriction Model of Depressed Affect. In: Williamson G, Shaffer D, Parmelee P, eds. *Physical Illness and Depression in Older Adults*: Kluwer Academic Publishers, 2000.
26. Altman DG, Royston P. Statistics notes - The cost of dichotomising continuous variables. *British Medical Journal* 2006;**332**(7549):1080-80.
27. Monroe SM, Slavich GM, Gotlib IH. Life stress and family history for depression: The moderating role of past depressive episodes. *Journal of Psychiatric Research* 2014;**49**:90-95.

**STROBE 2007 (v4) Statement—Checklist of items that should be included in reports of *cross-sectional studies* (Nollett et al)**

| Section/Topic                | Item # | Recommendation                                                                                                                                                                       | Reported on page # |
|------------------------------|--------|--------------------------------------------------------------------------------------------------------------------------------------------------------------------------------------|--------------------|
| <b>Title and abstract</b>    | 1      | (a) Indicate the study's design with a commonly used term in the title or the abstract                                                                                               | 1                  |
|                              |        | (b) Provide in the abstract an informative and balanced summary of what was done and what was found                                                                                  | 2                  |
| <b>Introduction</b>          |        |                                                                                                                                                                                      |                    |
| Background/rationale         | 2      | Explain the scientific background and rationale for the investigation being reported                                                                                                 | 3                  |
| Objectives                   | 3      | State specific objectives, including any prespecified hypotheses                                                                                                                     | 5                  |
| <b>Methods</b>               |        |                                                                                                                                                                                      |                    |
| Study design                 | 4      | Present key elements of study design early in the paper                                                                                                                              | 5                  |
| Setting                      | 5      | Describe the setting, locations, and relevant dates, including periods of recruitment, exposure, follow-up, and data collection                                                      | 5                  |
| Participants                 | 6      | (a) Give the eligibility criteria, and the sources and methods of selection of participants                                                                                          | 5                  |
| Variables                    | 7      | Clearly define all outcomes, exposures, predictors, potential confounders, and effect modifiers. Give diagnostic criteria, if applicable                                             | 6                  |
| Data sources/<br>measurement | 8*     | For each variable of interest, give sources of data and details of methods of assessment (measurement). Describe comparability of assessment methods if there is more than one group | 6, 7               |
| Bias                         | 9      | Describe any efforts to address potential sources of bias                                                                                                                            | 7                  |
| Study size                   | 10     | Explain how the study size was arrived at                                                                                                                                            | -                  |
| Quantitative variables       | 11     | Explain how quantitative variables were handled in the analyses. If applicable, describe which groupings were chosen and why                                                         | 7, 8               |
| Statistical methods          | 12     | (a) Describe all statistical methods, including those used to control for confounding                                                                                                | 8                  |
|                              |        | (b) Describe any methods used to examine subgroups and interactions                                                                                                                  | 8                  |
|                              |        | (c) Explain how missing data were addressed                                                                                                                                          | 8                  |
|                              |        | (d) If applicable, describe analytical methods taking account of sampling strategy                                                                                                   | 8                  |
|                              |        | (e) Describe any sensitivity analyses                                                                                                                                                | -                  |
| <b>Results</b>               |        |                                                                                                                                                                                      |                    |



|                          |     |                                                                                                                                                                                                              |           |
|--------------------------|-----|--------------------------------------------------------------------------------------------------------------------------------------------------------------------------------------------------------------|-----------|
| Participants             | 13* | (a) Report numbers of individuals at each stage of study—eg numbers potentially eligible, examined for eligibility, confirmed eligible, included in the study, completing follow-up, and analysed            | 8         |
|                          |     | (b) Give reasons for non-participation at each stage                                                                                                                                                         | 8         |
|                          |     | (c) Consider use of a flow diagram                                                                                                                                                                           | -         |
| Descriptive data         | 14* | (a) Give characteristics of study participants (eg demographic, clinical, social) and information on exposures and potential confounders                                                                     | 9, 10, 11 |
|                          |     | (b) Indicate number of participants with missing data for each variable of interest                                                                                                                          | 9, 10, 11 |
| Outcome data             | 15* | Report numbers of outcome events or summary measures                                                                                                                                                         | 9-13      |
| Main results             | 16  | (a) Give unadjusted estimates and, if applicable, confounder-adjusted estimates and their precision (eg, 95% confidence interval). Make clear which confounders were adjusted for and why they were included | 9-13      |
|                          |     | (b) Report category boundaries when continuous variables were categorized                                                                                                                                    | 6         |
|                          |     | (c) If relevant, consider translating estimates of relative risk into absolute risk for a meaningful time period                                                                                             | -         |
| Other analyses           | 17  | Report other analyses done—eg analyses of subgroups and interactions, and sensitivity analyses                                                                                                               | -         |
| <b>Discussion</b>        |     |                                                                                                                                                                                                              |           |
| Key results              | 18  | Summarise key results with reference to study objectives                                                                                                                                                     | 16        |
| Limitations              | 19  | Discuss limitations of the study, taking into account sources of potential bias or imprecision. Discuss both direction and magnitude of any potential bias                                                   | 17, 18    |
| Interpretation           | 20  | Give a cautious overall interpretation of results considering objectives, limitations, multiplicity of analyses, results from similar studies, and other relevant evidence                                   | 16-18     |
| Generalisability         | 21  | Discuss the generalisability (external validity) of the study results                                                                                                                                        | 17        |
| <b>Other information</b> |     |                                                                                                                                                                                                              |           |
| Funding                  | 22  | Give the source of funding and the role of the funders for the present study and, if applicable, for the original study on which the present article is based                                                | 19        |

\*Give information separately for cases and controls in case-control studies and, if applicable, for exposed and unexposed groups in cohort and cross-sectional studies.

**Note:** An Explanation and Elaboration article discusses each checklist item and gives methodological background and published examples of transparent reporting. The STROBE checklist is best used in conjunction with this article (freely available on the Web sites of PLoS Medicine at <http://www.plosmedicine.org/>, Annals of Internal Medicine at <http://www.annals.org/>, and Epidemiology at <http://www.epidem.com/>). Information on the STROBE Initiative is available at [www.strobe-statement.org](http://www.strobe-statement.org).

# BMJ Open

## Depressive symptoms in people with a vision impairment: A cross-sectional study to identify who is most at risk

|                                 |                                                                                                                                                                                                                                                                                                                                                                                                                                                                                                                                                                                                                                                                                                                                                                                                               |
|---------------------------------|---------------------------------------------------------------------------------------------------------------------------------------------------------------------------------------------------------------------------------------------------------------------------------------------------------------------------------------------------------------------------------------------------------------------------------------------------------------------------------------------------------------------------------------------------------------------------------------------------------------------------------------------------------------------------------------------------------------------------------------------------------------------------------------------------------------|
| Journal:                        | <i>BMJ Open</i>                                                                                                                                                                                                                                                                                                                                                                                                                                                                                                                                                                                                                                                                                                                                                                                               |
| Manuscript ID                   | bmjopen-2018-026163.R1                                                                                                                                                                                                                                                                                                                                                                                                                                                                                                                                                                                                                                                                                                                                                                                        |
| Article Type:                   | Research                                                                                                                                                                                                                                                                                                                                                                                                                                                                                                                                                                                                                                                                                                                                                                                                      |
| Date Submitted by the Author:   | 07-Nov-2018                                                                                                                                                                                                                                                                                                                                                                                                                                                                                                                                                                                                                                                                                                                                                                                                   |
| Complete List of Authors:       | Nollett, Claire; Cardiff University, Centre for Trials Research<br>Ryan, Barbara; Cardiff University, School of Optometry and Vision Sciences<br>Bray, Nathan; Centre for Health Economics and Medicines Evaluation, Bangor University,<br>Bunce, Catey; kings College london, School of Population and Environmental Sciences<br>Casten, Robin; Thomas Jefferson University, Department of Psychiatry and Human Behaviour<br>Edwards, Rhiannon; Bangor University, Centre for Health Economics & Medicines Evaluation<br>Gillespie, David; Cardiff University, Centre for Trials Research<br>Smith, Daniel; University of Glasgow, Institute of Health and Wellbeing<br>Stanford, Miles; St Thomas' Hospital, Medical Eye Unit<br>Margrain, Tom; Cardiff University, School of Optometry and Vision Sciences |
| <b>Primary Subject Heading</b>: | Ophthalmology                                                                                                                                                                                                                                                                                                                                                                                                                                                                                                                                                                                                                                                                                                                                                                                                 |
| Secondary Subject Heading:      | Mental health                                                                                                                                                                                                                                                                                                                                                                                                                                                                                                                                                                                                                                                                                                                                                                                                 |
| Keywords:                       | Depression & mood disorders < PSYCHIATRY, GERIATRIC MEDICINE, OPHTHALMOLOGY                                                                                                                                                                                                                                                                                                                                                                                                                                                                                                                                                                                                                                                                                                                                   |
|                                 |                                                                                                                                                                                                                                                                                                                                                                                                                                                                                                                                                                                                                                                                                                                                                                                                               |

SCHOLARONE™  
Manuscripts

1  
2  
3 **Depressive symptoms in people with a vision impairment: A cross-sectional study to identify who**  
4 **is most at risk**  
5  
6  
7  
8  
9

10 Claire Nollett, Centre for Trials Research, College of Biomedical & Life Sciences, Cardiff University,  
11 4th Floor, Neuadd Meirionnydd, Heath Park, Cardiff, CF14 4YS, UK. [nollettcl@cardiff.ac.uk](mailto:nollettcl@cardiff.ac.uk) 02920  
12 687 187\*  
13  
14

15  
16 Barbara Ryan, School of Optometry and Vision Sciences, Cardiff University, Cardiff, UK  
17

18  
19 Nathan Bray, Centre for Health Economics and Medicines Evaluation, Bangor University, Bangor, UK  
20

21 Catey Bunce, School of Population Health and Environmental Sciences, King's College London,  
22 London, UK  
23

24  
25 Robin Casten, Department of Psychiatry and Human Behavior, Sidney Kimmel Medical College at  
26 Thomas Jefferson University, Philadelphia, USA  
27

28  
29 Rhiannon T. Edwards, Centre for Health Economics and Medicines Evaluation, Bangor University,  
30 Bangor, UK  
31

32  
33 David Gillespie, Centre for Trials Research, Cardiff University, Cardiff, UK  
34

35  
36 Daniel J. Smith, Institute of Health and Wellbeing, University of Glasgow, Glasgow, UK  
37

38  
39 Miles Stanford, Medical Eye Unit, St Thomas' Hospital, London, UK  
40

41  
42 Tom H. Margrain, School of Optometry and Vision Sciences, Cardiff University, Cardiff, UK  
43

44 \*Corresponding author  
45  
46  
47  
48  
49  
50  
51  
52  
53  
54  
55  
56  
57  
58  
59  
60

## ABSTRACT

**Objective:** To identify the risk factors for significant depressive symptoms in people with visual impairment in England and Wales to provide information on who is most at risk and to whom support services could be targeted in future.

**Design:** A cross-sectional study using baseline data from a pragmatic randomised controlled trial.

**Setting and Participants:** 990 participants aged 18 or over attending one of fourteen low vision rehabilitation primary care optometry based clinics in South Wales or two hospital clinics in London.

**Outcome measure:** A score of  $\geq 6$  on the Geriatric Depression Scale (GDS-15) was classed as clinically significant depressive symptoms.

**Results:** In a multivariable logistic regression model, significant depressive symptoms were associated with age (adjusted odds ratio (AOR) = 0.82, 95%CI: 0.66 to 0.90,  $p < 0.001$ ), ethnicity (AOR non-white compared to white = 1.72, 95%CI: 1.05 to 2.81,  $P = 0.031$ ), total number of eye conditions (AOR for two versus one condition = 0.98, 95%CI: 0.67 to 1.43; three or more versus one condition = 0.34, 95%CI: 0.15 to 0.75,  $p = 0.026$ ), self-reported health (AOR for excellent versus poor = 0.01, 95%CI: 0.00 to 0.12; very good versus poor = 0.06, 95%CI: 0.03 to 0.13; good versus poor = 0.14, 95%CI: 0.08 to 0.24; fair versus poor = 0.28, 95%CI: 0.18 to 0.46,  $p < 0.001$ ) and self-reported visual functioning (AOR = 1.45, 95%CI: 1.31 to 1.61,  $p < 0.001$ ).

**Conclusion:** Younger age, a non-white ethnicity, fewer eye conditions and poorer self-reported health and visual function are risk factors for significant depressive symptoms in this population.

**Trial registration:** ISRCTN46824140

## KEYWORDS

depression, vision impairment, sight loss, risk factor, depressive symptoms

## ARTICLE SUMMARY

### Strengths and Limitations of the Study

- This is the first study of risk factors for depressive symptoms in people seeking help for vision impairment in England and Wales.
- It benefits from a large sample size (n=990) and a high response rate (n=990/1323, 74.8%) which increase the generalisability of the findings.
- It examines factors which can be readily assessed by practitioners in primary care and general hospital clinics who come into contact with people with vision impairment, enabling them to be alerted to those most at risk and in need of signposting to support services.
- However, it excludes some more difficult to measure factors, such as vision specific distress, coping style and perceived social support, which may also predict depression in this population.
- The study uses a cross-sectional design so conclusions about direction of causality cannot be made.

## BACKGROUND

Vision impairment impacts on all aspects of life and is associated with reduced functional ability, falls, social isolation and reduced quality-of-life.<sup>1-3</sup> There is also a growing awareness that it has a negative impact on mental health status too. Population based studies provide robust evidence of an association between vision impairment and depression. Typically those with a vision impairment are 2 to 3 times more likely to be depressed.<sup>4 5</sup> In Britain, for example, a large survey of >13,000 older adults found that the prevalence of significant depressive symptoms in those with good vision living in the community was about 4.6% while in those with a vision impairment (<6/18) it was 13.5%.<sup>5</sup>

The prevalence of significant depressive symptoms is also high in those accessing rehabilitation services. Results from a study in Australia found that when screened with the two item Patient Health Questionnaire (PHQ-2), 37% of patients attending rehabilitation clinics or eye care services screened positive for depressive symptoms.<sup>6</sup> Here in the UK, we screened over 1000 patients attending low vision rehabilitation appointments using the Geriatric Depression Scale (GDS-15), as part of the Depression in Visual Impairment Trial (DEPVIT), a randomised controlled trial.<sup>7</sup> We found that 43% of patients reported significant depressive symptoms (score  $\geq 6$ ) and, significantly, 74.8% were not receiving any treatment for depression.<sup>8</sup> This finding supports previous reports that people with a vision impairment are less likely to have their depression identified than those with good vision.<sup>9-11</sup>

Because depression goes under-detected in this patient group, there is a need to improve routine screening. The National Institute for Health and Care Excellence (NICE), in their guidelines on 'Depression in adults with a chronic physical health problem'<sup>12</sup> suggest that practitioners working in primary care and general hospital clinics should be aware that patients with a chronic physical health problem, especially those with functional impairment, are at a high risk of depression. They recommend being alert to possible depression and asking two simple screening questions to detect depression.<sup>12</sup> Those screening positively should be referred to an appropriate professional for assessment, in most cases, the patient's General Practitioner (GP). Screening should occur in both low vision specific settings such as rehabilitation clinics, and in primary care and general clinical settings such as diabetes or stroke clinics, where vision impairment is prevalent. In busy primary care and general clinics, understanding who is most at risk of depression amongst this patient group using easy to determine factors may help clinicians to target depression screening and signpost patients to supportive services.

Previous cross-sectional studies of patients from outpatient eye clinics and low vision rehabilitation services have identified several risk factors for depression including: being female, being relatively younger in age, living alone and having lower acceptance of vision loss<sup>13</sup>, reporting poorer self-reported health and having a history of mental health problems,<sup>13 14</sup> reporting poorer vision specific functioning, higher levels of vision

1  
2  
3 specific distress, having an avoidant coping style and lower perceived adequacy of social support<sup>14</sup>. A  
4 longitudinal prospective cohort study of 540 patients from outpatient low vision organisations in the  
5 Netherlands and Belgium found that people who developed depressive symptoms over a two year period were  
6 more likely to be: living alone, having just enough money to cover their expenses, have macular degeneration,  
7 have problems with adaptation to vision loss, have reduced health related quality of life and be experiencing  
8 symptoms of anxiety.<sup>15</sup>  
9  
10  
11  
12

13  
14 The above studies were conducted in the Netherlands, Belgium and Australia and we do not know if the same  
15 risk factors apply to a British population. Therefore, it is useful to examine the risk factors for depressive  
16 symptoms in people with sight loss in England and Wales, using a large sample of consecutive attendees to  
17 services. The findings will enable clinicians in primary care and general hospital clinics to allocate resources to  
18 screening those most at risk.  
19  
20  
21  
22

23 The aim of this study was to identify the risk factors for significant depressive symptoms in people with vision  
24 impairment attending rehabilitation clinics in England and Wales using baseline data from a randomised  
25 controlled trial of interventions for depression (DEPVIT).<sup>7</sup> We focused our examination mainly on  
26 characteristics which can be easily identified in routine practice for example, age and ethnicity, to provide a  
27 straightforward approach to identifying high risk patients based on readily available information.  
28  
29  
30  
31  
32  
33

## 34 **METHODS**

### 35 **Study Design and Participants**

36  
37 This cross-sectional study was undertaken as part of the Depression in Visual Impairment Trial (DEPVIT).<sup>7</sup>  
38 Eligible participants were consecutive adult patients who were seeking help for vision impairment at specialist  
39 visual rehabilitation services taking part in DEPVIT. Fourteen primary care based rehabilitation services  
40 recruited participants in South Wales. Services were readily accessible high street practices, accepted self-  
41 referral and tended to cater to older adults with age-related eye conditions living in the local community. A  
42 secondary care rehabilitation clinic based at Guys and St Thomas' Hospital and an NHS outreach clinic  
43 providing low vision services in Southwark recruited participants from the London area. Access to these two  
44 specialist clinics was by referral only. All consecutive attendees aged 18 or over were considered eligible for  
45 the study, unless they lived outside the catchment area for the trial or if they had previously been screened  
46 for depression as part of the study (some people had more than one appointment during the length of the  
47 study, but we only wanted to screen them and invite them to take part once). Ethical approval was obtained  
48 from the NHS South East Wales Research Ethics Committee Panel B. All participants provided written informed  
49 consent for their anonymised data to be used and the study adhered to the Declaration of Helsinki.  
50  
51  
52  
53  
54  
55  
56  
57  
58  
59  
60

## Funding and Public and Patient Involvement

The study was funded by Guide Dogs, a voluntary sector organisation who work closely with people with vision impairment and understand their experiences and preferences. They carried out a review prior to funding to ensure the research questions were relevant and the study design appropriate. Patients with a vision impairment reviewed and provided feedback on the depression questionnaire. Patients were not involved in the recruitment to or conduct of the study.

## Measures

### Depression

The Geriatric Depression Scale (GDS-15)<sup>16</sup> is one of the most widely used instruments for the screening of depression in older adults. The questionnaire has 15 questions and completion time is approximately 5 minutes. Possible scores range from 0 to 15, with higher scores indicating a greater number of depressive symptoms. We chose to use dichotomous categories rather than the continuous scale as this reflects the scale's use in clinical practice as a screening tool to identify those who warrant further investigation. We used the conventional scoring approach rather than Rasch analysis to facilitate direct comparison with published studies and to facilitate clinically valid results. A score of 6 or more was taken to be indicative of significant depressive symptoms<sup>5</sup>.

### Risk Factors

We recorded gender, age, ethnicity (White, Asian/Asian British, Black/Black British or Other), physical illness (number and type from a list of seven plus an 'other' category) and ocular diagnosis (number and type of eye conditions from a list of five plus an 'other' category), factors which would be readily available to clinicians working with people with sight loss and have been considered in previous studies.

We also measured self-reported general health as this has consistently been shown to be a risk factor for depression<sup>6 13-15</sup> and can be easily measured using a single item question from the SF-12, "In general, would you say your overall health is: excellent, very good, good, fair or poor?". The question has had widespread use as a single-item measure, including in previous studies of visual impairment and depression<sup>5 14</sup> and has shown to be significantly and independently associated with specific health problems, use of health services, changes in functional status, recovery from episodes of ill health, mortality, and sociodemographic characteristics of respondents.<sup>17</sup>

To provide information on vision related factors for low vision practitioners who have access to this information, we also measured presenting corrected binocular visual acuity using ETDRS LogMAR and recorded time since vision loss in years. As previous studies have found no evidence of an association between



1  
2  
3 objective measures of visual acuity and depression<sup>13-15</sup>, we were interested to see whether a subjective  
4 measure of visual function would be associated. Self-reported visual functioning was measured using the 7  
5 item National Eye Institute Visual Function Questionnaire (NEI-VFQ 7) which includes a subset of questions  
6 from the National Eye Institute Visual Function Questionnaire that have previously been shown to be  
7 responsive to rehabilitation service intervention.<sup>18</sup> As the NEI-VFQ 7 is commonly reported in the published  
8 literature with Rasch analysis, we transformed the Likert responses using the Rasch derived scoring key  
9 provided by Ryan et al (2008)<sup>18</sup> to calculate a score for each completed questionnaire. A higher score indicates  
10 a greater perceived difficulty with visual functioning. Questionnaires with 3 or more missing items were  
11 counted as missing and excluded from the analysis.  
12  
13  
14  
15  
16  
17  
18

### 19 **Procedures**

20  
21 Participants who were eligible to take part in the study were sent a questionnaire in large print format  
22 containing the GDS-15, NEI-VFQ 7 and single-item question about health, along with their appointment letter  
23 at least one week before their low vision assessment. They were asked to complete the questionnaire at home,  
24 with assistance if needed, and to bring it along to their appointment. Those who did not return a completed  
25 questionnaire were given the opportunity to complete another copy at the clinic, before their appointment.  
26 The low vision practitioner reviewed the participant's responses with them at the start of the assessment and  
27 asked for their written consent to use their anonymised responses in the study. For those who consented,  
28 information on gender, date of birth, ethnicity, physical illness, ocular diagnosis, corrected ETDRS Log MAR  
29 acuity and time since vision loss first identified were recorded on a Case Report Form (CRF). Those who  
30 screened positive for depressive symptoms (GDS-15 score of  $\geq 6$ ) were offered entry to the DEPVIT trial if  
31 eligible, or a referral to their GP if not eligible.<sup>19</sup>  
32  
33  
34  
35  
36  
37  
38  
39

40 Case Report Forms completed by the clinicians were sent to the research coordinating centre at Cardiff  
41 University by secure FAX where the validity and completeness of the data was checked. Any missing or out of  
42 range data were queried with the practitioner and checked with clinical notes. Five percent of all CRFs and  
43 surveys were double entered. The error rate was less than 2% and identified errors were corrected. The  
44 number of eligible patients who did not complete the survey and the number who did not consent for their  
45 data to be used for research purposes were also recorded. The final dataset was then locked and transferred  
46 to the statistical team for analysis. The descriptive statistics were tabulated using SPSS Version 23 and the  
47 regression models were fitted using STATA Version 13.1.  
48  
49  
50  
51  
52  
53

### 54 **Statistical analysis**

55  
56 Participant characteristics were summarised for those with significant depressive symptoms (GDS-15  $\geq 6$ ) and  
57 those without (GDS-15  $< 6$ ). Categorical variables were summarised as numbers and percentages and  
58  
59  
60

1  
2  
3 continuous variables as medians with interquartile ranges. In all cases we report the number of participants  
4 for whom data was missing.  
5

6  
7 Where the GDS-15 was not fully completed, completed answers were totalled to give a final score provided  
8 that the number of questions not answered was 2 or less<sup>5</sup>. If 3 or more questions were unanswered, the GDS-  
9 15 data were regarded as missing and the participant excluded from the analysis.  
10  
11

12  
13 Logistic regression was used to determine the independent relationship between each of the potential risk  
14 factors and significant depressive symptoms. The potential risk factors were initially included individually  
15 (univariable analysis) and then entered into a multivariable logistic regression analyses in blocks to determine  
16 which variables remain associated with significant depressive symptoms after controlling for the other factors.  
17 The events-per-variable was sufficient to allow inclusion of all potential risk factors, so no selection was  
18 required.<sup>20</sup> However, due to co-linearity, it was not possible to include both number and type of physical  
19 illnesses or both number and type of eye conditions. Therefore, a decision was made to include only number  
20 of illnesses and eye conditions, as it was hypothesized that burden of multiple diagnoses would be more  
21 important than type of diagnosis: those with multiple morbidity are at twice the risk of depression than those  
22 without multiple morbidity.<sup>21</sup> The variables were entered into the analysis in blocks, starting with the risk  
23 factors which could be most easily identified in routine clinics, and ending with those requiring more time or  
24 adaptation to practice to assess. The blocks were: 1) Demographics (gender/age/ethnicity), 2) Demographics  
25 and Physical Health (number of illnesses), 3) Demographics, Physical health and Eye health (number of eye  
26 conditions/visual acuity/time since vision loss), 4) Demographics, Physical Health, Eye health and Self-report  
27 measures (self-report health/visual functioning). We calculated the area under the ROC curve to quantify the  
28 overall ability of each (additional) block of variables to correctly discriminate between those with and without  
29 depression.  
30  
31  
32  
33  
34  
35  
36  
37  
38  
39  
40  
41  
42  
43  
44

## 45 RESULTS

46  
47 A total of 1323 consecutive adult patients attended the low vision rehabilitation clinics during the 30 month  
48 recruitment period. Of these, 312 were not screened for depression because the practitioner felt it was  
49 inappropriate at the time (because the patient was too ill, had dementia or was recently bereaved); or the  
50 patient had forgotten to complete the questionnaire and there was no time at the assessment; or they did not  
51 consent for their data to be used for research. An additional 21 patients had 3 or more missing items on the  
52 GDS-15 and were excluded, leaving a final sample size of 990 and a complete response rate of 74.8%. The  
53 median age of the participants was 79.0 years (IQR= 66.0 to 85.0), 62.2% were female (n=616) and 85% were  
54 white (n= 842). The overall prevalence of significant depressive symptoms was 42.5%. This varies very slightly  
55  
56  
57  
58  
59  
60

from our previously reported study (43%)<sup>8</sup> due to the methodology used in this study to calculate the total GDS-15 score (excluding those with  $\geq 3$  missing items).

Tables 1-4. outline the demographics characteristics of the participants, their physical health measures, eye health measures and self-report health and vision measures respectively, split by those with and without significant depressive symptoms.

*Table 1. Summarises the demographic characteristics of those with and without significant depressive symptoms*

| Demographic Characteristics             | GDS-15 Score <6   | GDS-15 Score $\geq 6$ | Total             |
|-----------------------------------------|-------------------|-----------------------|-------------------|
| Total Sample, n (%)                     | 569 (57.5%)       | 421 (42.5%)           | 990 (100%)        |
| Gender, n (%)                           |                   |                       |                   |
| Male                                    | 201 (53.7%)       | 173 (46.3%)           | 374 (100%)        |
| Female                                  | 368 (59.7%)       | 248 (40.3%)           | 616 (100%)        |
| Data missing                            | 0                 | 0                     | 0                 |
| Age (years), Median (IQR)               | 80.0 (72.0, 86.0) | 77.0 (57.0, 85.0)     | 79.0 (66.0, 85.0) |
| Data missing, n (%)                     | 22 (52.4%)        | 20 (47.6%)            | 42 (100%)         |
| Ethnicity, n (%)                        |                   |                       |                   |
| White                                   | 508 (60.3%)       | 334 (39.7%)           | 842 (100%)        |
| Asian/Asian/British                     | 12 (52.2%)        | 11 (47.8%)            | 23 (100%)         |
| Black/Black British                     | 40 (38.5%)        | 64 (61.5%)            | 104 (100%)        |
| Other ethnic group                      | 9 (45%)           | 11 (55%)              | 20 (100%)         |
| Data missing                            | 0 (0%)            | 1 (100%)              | 1 (100%)          |
| Ethnicity (collapsed categories), n (%) |                   |                       |                   |
| White                                   | 508 (60.3%)       | 334 (39.7%)           | 842 (100%)        |
| Non-White                               | 61 (41.5%)        | 86 (58.5%)            | 147 (100%)        |
| Data missing                            | 0 (0%)            | 1 (100%)              | 1 (100%)          |

Table 2. Summarises the physical health of those with and without significant depressive symptoms

| Physical health                                                  | GDS-15 Score <6 | GDS-15 Score ≥6 | Total      |
|------------------------------------------------------------------|-----------------|-----------------|------------|
| Physical Illnesses*, n (%)                                       |                 |                 |            |
| Diabetes                                                         | 119 (47.8%)     | 130 (52.2%)     | 249 (100%) |
| Epilepsy                                                         | 8 (57.1%)       | 6 (42.9%)       | 14 (100%)  |
| Stroke                                                           | 31 (50.8%)      | 30 (49.2%)      | 61 (100%)  |
| Thyroid                                                          | 27 (47.4%)      | 30 (52.6%)      | 57 (100%)  |
| Heart Disease                                                    | 94 (50.3%)      | 93 (49.7%)      | 187 (100%) |
| High Blood Pressure                                              | 246 (55.5%)     | 197 (44.5%)     | 443 (100%) |
| Respiratory Disease                                              | 48 (59.3%)      | 33 (40.7%)      | 81 (100%)  |
| Other                                                            | 113 (48.9%)     | 118 (51.1%)     | 231 (100%) |
| No medical illness                                               | 113 (70.2%)     | 48 (29.8%)      | 161 (100%) |
| Data missing                                                     | 4 (100%)        | 0 (0%)          | 4 (100%)   |
| Total number of physical illnesses, n (%)                        |                 |                 |            |
| 0                                                                | 113 (70.2%)     | 48 (29.8%)      | 161 (100%) |
| 1                                                                | 277 (60.6%)     | 180 (39.4%)     | 457 (100%) |
| 2                                                                | 127 (48.3%)     | 136 (51.7%)     | 263 (100%) |
| 3                                                                | 41 (47.7%)      | 45 (52.3%)      | 86 (100%)  |
| 4                                                                | 4 (28.6%)       | 10 (71.4%)      | 14 (100%)  |
| 5                                                                | 2 (50%)         | 2 (50%)         | 4 (100%)   |
| 6                                                                | 1 (100%)        | 0 (0%)          | 1 (100%)   |
| Data missing                                                     | 4 (100%)        | 0 (0%)          | 4 (100%)   |
| Total number of physical illnesses (collapsed categories), n (%) |                 |                 |            |
| 0                                                                | 113 (70.2%)     | 48 (29.8%)      | 161 (100%) |
| 1                                                                | 277 (60.6%)     | 180 (39.4%)     | 457 (100%) |
| 2                                                                | 127 (48.3%)     | 136 (51.7%)     | 263 (100%) |
| 3 or more                                                        | 48 (45.7%)      | 57 (54.3%)      | 105 (100%) |
| Data missing                                                     | 4 (100%)        | 0 (0%)          | 4 (100%)   |

\* Participants may have had more than one physical illness

Table 3. Summarises the eye health of those with and without significant depressive symptoms

| Eye health                                                   | GDS-15 Score <6   | GDS-15 Score ≥6   | Total            |
|--------------------------------------------------------------|-------------------|-------------------|------------------|
| Ocular Diagnosis*, n (%)                                     |                   |                   |                  |
| AMD wet                                                      | 117 (59.4%)       | 80 (40.6%)        | 197 (100%)       |
| AMD dry                                                      | 259 (64.6%)       | 142 (35.4%)       | 401 (100%)       |
| Glaucoma                                                     | 104 (63.0%)       | 61 (37%)          | 165 (100%)       |
| Cataract                                                     | 95 (70.4%)        | 40 (29.6%)        | 135 (100%)       |
| Diabetic eye disease                                         | 59 (48.0%)        | 64 (52.0%)        | 123 (100%)       |
| Other eye condition                                          | 157 (47.9%)       | 171 (52.1%)       | 328 (100%)       |
| Data missing                                                 | 1 (50%)           | 1 (50%)           | 2 (100%)         |
| Total number of eye conditions, n (%)                        |                   |                   |                  |
| 1                                                            | 381 (56%)         | 299 (44.0%)       | 680 (100%)       |
| 2                                                            | 153 (58.8%)       | 107 (41.2%)       | 260 (100%)       |
| 3                                                            | 32 (72.7%)        | 12 (27.3%)        | 44 (100%)        |
| 4                                                            | 2 (66.7%)         | 1 (33.3%)         | 3 (100%)         |
| 5                                                            | 0 (0%)            | 1 (100%)          | 1 (100%)         |
| Data missing                                                 | 1 (50%)           | 1 (50%)           | 2 (100%)         |
| Total number of eye conditions (collapsed categories), n (%) |                   |                   |                  |
| 1                                                            | 381 (56.0%)       | 299 (44.0%)       | 680 (100%)       |
| 2                                                            | 153 (58.8%)       | 107 (41.2%)       | 260 (100%)       |
| 3 or more                                                    | 34 (70.8%)        | 14 (29.2%)        | 48 (100%)        |
| Data missing                                                 | 1 (50%)           | 1 (50%)           | 2 (100%)         |
| Corrected binocular visual acuity (logMar), Median (IQR)     | 0.60 (0.40, 0.94) | 0.70 (0.50, 1.00) | 0.67 (0.40, 1.0) |
| Data missing, n (%)                                          | 0                 | 0                 | 0                |
| Years since vision loss, Median (IQR)                        | 5.5 (2.2, 12.0)   | 5.0 (2.1, 10.2)   | 5.2 (2.2, 11.1)  |
| Data missing, n (%)                                          | 13 (81.25%)       | 3 (18.75%)        | 16 (100%)        |

\* All ocular diagnoses - participants may have had more than one.

Table 4. Summarises the self-reported health and visual function of those with and without significant depressive symptoms

| Self-report measures                          | GDS-15 Score <6    | GDS-15 Score ≥6   | Total              |
|-----------------------------------------------|--------------------|-------------------|--------------------|
| Self-rated health(SF-12), n (%)               |                    |                   |                    |
| Excellent                                     | 22 (95.7%)         | 1 (4.3%)          | 23 (100%)          |
| Very Good                                     | 93 (86.1%)         | 15 (13.9%)        | 108 (100%)         |
| Good                                          | 201 (72.6%)        | 76 (27.4%)        | 277 (100%)         |
| Fair                                          | 192 (52.5%)        | 174 (47.5%)       | 366 (100%)         |
| Poor                                          | 33 (18.5%)         | 145 (81.5%)       | 178 (100%)         |
| Data Missing                                  | 28 (73.7%)         | 10 (26.3%)        | 38 (100%)          |
| Visual functioning* (NEI VFQ-7), Median (IQR) | 0.23 (-1.43, 1.46) | 1.41 (0.17, 2.49) | 0.78 (-0.80, 1.91) |
| Data missing n (%)                            | 23 (67.6%)         | 11 (32.4%)        | 34 (100%)          |

\* NEI VFQ-7 scores have been Rasch analysed and a higher score indicates a greater perceived difficulty with visual functioning.

1  
2  
3  
4 The variables ethnicity, number of physical illnesses and number of eye conditions had a small number of  
5 participants in some categories, hence the categories were collapsed before being entered into the regression  
6 analysis. Both the original and collapsed categories are presented in the tables. Table 5 Summarises the results  
7 of the univariable and multivariable logistic regression using odds ratios (OR) and adjusted odds ratios (AOR)  
8 and are presented with 95% confidence intervals (CI) and p values.  
9  
10  
11  
12  
13  
14  
15  
16  
17  
18  
19  
20  
21  
22  
23  
24  
25  
26  
27  
28  
29  
30  
31  
32  
33  
34  
35  
36  
37  
38  
39  
40  
41  
42  
43  
44  
45  
46  
47  
48  
49  
50  
51  
52  
53  
54  
55  
56  
57  
58  
59  
60

For peer review only

| Block                   | Characteristic                                          | Univariable |      |              |        | Multivariable Block 1<br>N=947 |              |        | Multivariable Block 2<br>N=943 |              |        | Multivariable Block 3<br>N=926 |              |              | Multivariable Block 4<br>N=877 |              |        |
|-------------------------|---------------------------------------------------------|-------------|------|--------------|--------|--------------------------------|--------------|--------|--------------------------------|--------------|--------|--------------------------------|--------------|--------------|--------------------------------|--------------|--------|
|                         |                                                         | N           | OR   | 95% CI       | P      | AOR                            | 95% CI       | P      | AOR                            | 95% CI       | P      | AOR                            | 95% CI       | P            | AOR                            | 95% CI       | P      |
| 1. Demographics         | <b>Gender: Reference category male</b>                  |             |      |              |        |                                |              |        |                                |              |        |                                |              |              |                                |              |        |
|                         | • Female                                                | 990         | 0.78 | 0.60 to 1.01 | 0.064  | 0.87                           | 0.66 to 1.14 | 0.311  | 0.89                           | 0.67 to 1.17 | 0.390  | 0.90                           | 0.68 to 1.19 | 0.462        | 0.85                           | 0.61 to 1.19 | 0.350  |
|                         | <b>Age (per decade)</b>                                 | 948         | 0.82 | 0.74 to 0.90 | <0.001 | 0.82                           | 0.82 to 0.90 | <0.001 | 0.82                           | 0.74 to 0.90 | <0.001 | 0.82                           | 0.74 to 0.90 | <0.001       | 0.82                           | 0.66 to 0.90 | <0.001 |
|                         | <b>Ethnicity: Reference category white</b>              |             |      |              |        |                                |              |        |                                |              |        |                                |              |              |                                |              |        |
|                         | • Non-white                                             | 989         | 2.14 | 1.50 to 3.06 | <0.001 | 1.54                           | 1.05 to 2.27 | 0.027  | 1.64                           | 1.10 to 2.43 | 0.014  | 1.61                           | 1.08 to 2.40 | 0.020        | 1.72                           | 1.05 to 2.81 | 0.031  |
| 2. Physical Health      | <b>Total illnesses: Reference category 0 illness</b>    |             |      |              |        |                                |              |        |                                |              |        |                                |              |              |                                |              |        |
|                         | • 1 illness                                             | 986         | 1.53 | 1.04 to 2.25 | <0.001 |                                |              | <0.001 | 2.06                           | 1.34 to 3.18 |        | 2.09                           | 1.36 to 3.24 | <0.001       | 1.28                           | 0.77 to 2.13 | 0.051  |
|                         | • 2 illnesses                                           |             | 2.52 | 1.66 to 3.82 |        |                                |              |        | 3.55                           | 2.23 to 5.65 |        | 3.62                           | 2.26 to 5.78 |              | 1.96                           | 1.14 to 3.37 |        |
|                         | • 3 + illnesses                                         |             | 2.80 | 1.68 to 4.66 |        |                                |              |        | 3.91                           | 2.24 to 6.82 |        | 4.02                           | 2.27 to 7.11 |              | 1.68                           | 0.86 to 3.29 |        |
| 3. Eye Health           | <b>Total eye conditions: Reference category 1 cond.</b> |             |      |              |        |                                |              |        |                                |              |        |                                |              |              |                                |              |        |
|                         | • 2 conditions                                          | 988         | 0.89 | 0.67 to 1.19 | 0.123  |                                |              |        |                                | 0.114        | 0.91   | 0.66 to 1.27                   | 0.98         | 0.67 to 1.43 | 0.026                          |              |        |
|                         | • 3 + conds.                                            |             | 0.52 | 0.28 to 1.00 |        |                                |              |        |                                |              | 0.48   | 0.24 to 0.96                   |              | 0.34         |                                | 0.15 to 0.75 |        |
|                         | <b>Visual acuity</b>                                    | 990         | 1.01 | 0.99 to 1.03 | 0.568  |                                |              |        |                                |              |        | 1.00                           | 0.98 to 1.03 | 0.929        | 1.00                           | 0.97 to 1.03 | 0.942  |
|                         | <b>Time since vision loss (per year)</b>                | 974         | 0.99 | 0.99 to 1.01 | 0.818  |                                |              |        |                                |              |        | 0.99                           | 0.98 to 1.00 | 0.075        | 0.99                           | 0.98 to 1.00 | 0.244  |
| 4. Self-report Measures | <b>Subjective Health: Reference category poor</b>       |             |      |              |        |                                |              |        |                                |              |        |                                |              |              |                                |              |        |
|                         | • Excellent                                             | 952         | 0.01 | 0.00 to 0.08 | <0.001 |                                |              |        |                                |              |        |                                |              |              | 0.01                           | 0.00 to 0.12 | <0.001 |
|                         | • Very Good                                             |             | 0.04 | 0.02 to 0.07 |        |                                |              |        |                                |              |        |                                |              |              | 0.06                           | 0.03 to 0.13 |        |
|                         | • Good                                                  |             | 0.09 | 0.05 to 0.14 |        |                                |              |        |                                |              |        |                                |              |              | 0.14                           | 0.08 to 0.24 |        |
|                         | • Fair                                                  |             | 0.21 | 0.13 to 0.32 |        |                                |              |        |                                |              |        |                                |              |              | 0.28                           | 0.18 to 0.46 |        |
|                         | <b>Visual Functioning</b>                               | 956         | 1.48 | 1.36 to 1.60 | <0.001 |                                |              |        |                                |              |        | 1.45                           | 1.31 to 1.61 | <0.001       |                                |              |        |
| Area Under ROC Curve    |                                                         |             |      |              | 0.59   |                                |              | 0.65   |                                |              | 0.65   |                                |              | 0.81         |                                |              |        |

1  
2  
3  
4  
5  
6  
7  
8  
9  
10  
11  
12  
13  
14  
15  
16  
17  
18  
19  
20  
21  
22  
23  
24  
25  
26  
27  
28  
29  
30  
31  
32  
33  
34  
35  
36  
37  
38  
39  
40  
41  
42  
43  
44  
45  
46

*Table 5. Summaries the results of the univariable logistic regression and multivariable regression analyses, with blocks of variables added sequentially to the model.*

For peer review only



## Demographics

Table 1. Shows that those with a higher prevalence of significant depressive symptoms were male, younger or non-white. In the univariable analysis, age and ethnicity were associated with significant depressive symptoms. An increase in age was associated with lower odds of participants having depression and having ethnicity other than white was associated with higher odds of having depression (see Table 5.). These variables remain associated once other variables were controlled for in the multivariable analysis final model. There was no evidence of an association between gender and significant depressive symptoms.

## Physical health

The prevalence of depression was lowest in those with no physical illness (29.8%) and highest in those with three or more illnesses (54.3% - Table 2.). In the univariable analysis, an increase in the number of physical illnesses was associated with higher odds of having significant depressive symptoms. This association remained when controlling for demographics and eye health but was no longer associated when controlling for subjective health and visual function.

## Eye health

Those with a higher prevalence of depression had one eye condition, worse visual acuity or less time since vision loss (Table 3.). The univariable analysis found no evidence of an association between significant depressive symptoms and number of eye conditions, visual acuity and time since vision loss. However, when controlling for other factors in the final model, an increase in the number of eye conditions was associated with lower odds of having significant depressive symptoms.

## Self-report measures

The prevalence of depression was highest in those with poor self-rated health (81.5%) and lowest in those with excellent health (4.3%). Those with significant depressive symptoms had worse self-rated visual functioning (Table 4.). Worse self-rated health and visual functioning were associated with higher odds of having significant depressive symptoms in both the univariable analysis and multivariable final model.

The area under the ROC curve was 0.59 when demographics alone were entered into the model, increasing to 0.65 when physical and eye health variables were considered, and reaching 0.81 when self-report measures were added.

## DISCUSSION

1  
2  
3 This study identified the risk factors for significant depressive symptoms in people with vision impairment  
4 attending vision rehabilitation clinics in England and Wales. We focused mainly on risk factors which can be  
5 easily identified in primary care and general hospital clinics, so as to provide a pragmatic approach to  
6 identifying high risk patients. To inform ophthalmic clinicians who may have access to more detailed  
7 information on eye health, we also included a range of vision related variables. Our findings showed that  
8 amongst older adults, those of relatively younger age, with an ethnicity other than white, and poorer self-  
9 reported health and visual function had higher odds of having significant depressive symptoms. Number of  
10 physical illnesses was an independent predictor of depressive symptoms, but there was no evidence of an  
11 association when controlling for subjective health and vision function. The number of eye conditions was not  
12 an independent predictor of depressive symptoms, but was related to depression when other variables were  
13 controlled: less number of eye conditions was associated with higher odds. There was no evidence that  
14 gender, time since vision loss and visual acuity were associated with depression.  
15  
16  
17  
18  
19  
20  
21  
22  
23

24 With regard to demographic factors, our findings demonstrate some support for, and discrepancies with,  
25 previous studies. In a study with an Australian population<sup>14</sup>, a univariate analysis provided evidence that  
26 younger age was associated with depressive symptoms, and in a European and Australian sample (relatively)  
27 younger age was shown to be associated with subthreshold depression in a multivariable analysis<sup>13</sup>. Our study  
28 corroborates these findings in a UK sample. This perhaps reflects the finding in the general population that  
29 people aged 40–59 years have higher rates of depression than those aged  $\geq 60$  years<sup>22</sup> and those in middle-age  
30 have the highest risk<sup>23</sup>. The reasons for this are not clearly understood, but one theory is that by mid-life,  
31 individuals have learnt to adapt to their strengths and weaknesses, and in mid-life ‘quell their infeasible  
32 aspirations’<sup>23</sup>. In those with vision loss, being affected in middle-age rather than old age may add to this sense  
33 of lost aspirations and could also result in more restriction in life including difficulties in finding and staying in  
34 work, playing sport etc. Our research found no evidence of an association between gender and depressive  
35 symptoms. Previous studies examining this association have differed in their findings. An Australian study  
36 showed no association in a univariate analysis<sup>14</sup>, whilst a model with a European and Australian sample found  
37 being female was a predictor of subthreshold depression<sup>13</sup>. The authors of a study with Dutch and Belgian  
38 participants reported that their findings on gender were inconclusive<sup>15</sup>. Differences in findings across the  
39 studies may indicate this factor is country specific, or may be due to differences in the measures used to assess  
40 depression. For example, we included people with all levels of depressive symptoms, whereas the  
41 European/Australian study included only subthreshold depression. It may be that being female is associated  
42 with subthreshold depression but there is no association when all levels of severity are considered. We found  
43 that having an ethnicity other than white was a risk factor. Recent studies on vision impairment and depression  
44 have not measured ethnicity, however an earlier study conducted in New Zealand found that ethnicity was  
45 not related to depression<sup>24</sup>. Differences between that study and ours may be due to the different populations,  
46  
47  
48  
49  
50  
51  
52  
53  
54  
55  
56  
57  
58  
59  
60

1  
2  
3 with a wider variation in ethnicities in the UK and London in particular. The New Zealand study only recorded  
4 'New Zealand born European' or 'other'. Therefore, future studies should include ethnicity as a variable to  
5 provide further clarification.  
6  
7

8  
9 There is more consistency between European and Australasian studies and our UK study in terms of health.  
10 We demonstrated that those with poorer self-reported health were at much higher risk of depressive  
11 symptoms. This confirms previous research in vision impaired people which has shown that poorer perceived  
12 health status<sup>13</sup>, poorer self-reported health<sup>14</sup> and poorer health related quality of life<sup>24</sup> are all predictors of  
13 depression. This is not surprising as patients may include their emotional health in a question about general  
14 health. Our study also found that a higher number of physical illnesses was an independent risk factor for  
15 depression. This is in line with findings from the non-vision impaired population. A recent meta-analysis found  
16 a substantial relationship between multimorbidity (the presence of two or more chronic physical illnesses) and  
17 depression, reporting that people with multimorbidity are at twice the risk of depression to those without  
18 multimorbidity, and nearly three times at risk compared to those with no chronic physical condition<sup>21</sup>. The  
19 authors suggest the relationship is bi-directional and cite the Activity Restriction Model of Depressed Affect<sup>25</sup>  
20 which explains that multimorbidity contributes significantly to depressive symptoms through having to give  
21 up valued activities due to physical limitations. In our sample, the limitations of conditions such as stroke and  
22 diabetes may have compounded any mobility and functional issues already caused by sight loss, which can  
23 make self-care, engaging in hobbies and getting out and about more difficult.  
24  
25

26  
27 In terms of vision related factors, it is logical to assume that the chances of having depressive symptoms  
28 increases as visual acuity decreases. However, in line with other European and Australian studies<sup>13-15</sup>, the  
29 results of the regression analysis do not support this hypothesis. What seems to be more important is self-  
30 reported visual function: those with worse self-reported visual function are more at risk of depressive  
31 symptoms<sup>26</sup>. Therefore clinicians should take care not to make assumptions about the likelihood of depression  
32 in only those with the lowest levels of vision as assessed by visual acuity. The relationship is likely to be  
33 bidirectional, with poorer visual function leading to loss of valued activities and mood, whilst lowered mood  
34 may influence a person's perception of their vision function. As with previous studies<sup>13 15</sup>, time since the vision  
35 loss was first identified was also not a predictor of depression, indicating that patients may develop symptoms  
36 at any point on their sight loss journey. The more surprising finding was that whilst number of eye conditions  
37 was not an independent predictor of depressive symptoms, when other factors were controlled then having  
38 more eye conditions was associated with lower odds of having depression. It is possible that this can be  
39 explained by the fact that those with three or more eye conditions were more likely to report other physical  
40 health conditions and this may reflect the presence of eye conditions induced by physical illnesses such as  
41 diabetes. Our research suggests that not all of the factors related to depressive symptoms in people with vision  
42 impairment are specific to that particular population. As with the general population, age, ethnicity and health  
43  
44  
45  
46  
47  
48  
49  
50  
51  
52  
53  
54  
55  
56  
57  
58  
59  
60

1  
2  
3 are associated with risk of depression and this needs to be taken into consideration when understanding the  
4 link between vision impairment and depression, and when considering suitable interventions.  
5  
6

7 This research added to the literature by examining risk factors in a British sample of people with vision  
8 impairment. The study benefited from a large sample size and a high response rate, enhancing the  
9 generalisability of the findings. As we included 14 low vision rehabilitation clinics across primary and secondary  
10 care, we believe the findings are transferrable to both settings in the UK. Our study employed validated  
11 measures of depressive symptoms and incorporated risk factors which are easy to identify in primary care and  
12 hospital clinics. Therefore the results can be easily integrated in clinical practice to target screening.  
13  
14  
15  
16

17 However, inevitably there were some value judgements in how we chose our criteria for selecting the range  
18 of potential factors in our study. This means that other parameters which have previously been shown to be  
19 predictors of depression, for example, vision specific distress, lower perceived adequacy of social support and  
20 avoidant coping<sup>14</sup>, were not measured and therefore cannot be included in the risk profile advice to clinicians.  
21 These parameters can only be assessed using additional questionnaires which would have increased the  
22 overall response burden in the study and furthermore, it is unlikely that these variables would be measured  
23 in routine practice and therefore were not within the scope of our study.  
24  
25  
26  
27  
28  
29

30 We chose to dichotomise the GDS-15 to reflect how it would be used in practice, as a screening tool for  
31 identifying patients who would benefit from screening in clinic and potentially signposting to support services.  
32 However, we acknowledge that this may have led to a reduction in power and loss of information.<sup>27</sup> A further  
33 limitation of the study is the use of a cross-sectional design, which means conclusions about direction of  
34 causality are not possible. Finally, whilst the completion rate of the GDS-15 was high, a number of patients  
35 were not screened at the discretion of the practitioners, including because they felt the patient was too ill,  
36 had dementia or had recently been bereaved, or they did not consent for their answers to be used for research.  
37 Therefore there may be a risk of bias as the non-completers may be systematically different from those that  
38 completed the questionnaire and consented to their data being used. Similarly, we excluded cases with  
39 missing data from the multivariable analysis and this simple approach to missing data may have introduced  
40 some bias. However, as only 113/990 (11%) were excluded, the risk of bias is low,  
41  
42  
43  
44  
45  
46  
47  
48

49 For the first time, for a population in England and Wales, our study demonstrates that for patients with vision  
50 impairment, there are several risk factors for depression which can be easily identified by those coming in to  
51 contact with people with sight loss. We recommend that all clinicians working with people with sight loss are  
52 alert to these factors. We advise screening higher risk patients using the simple two question screen  
53 recommended in the NICE guidelines<sup>12</sup>. If a patient is identified as having likely depression they should be  
54 managed according to the guidelines, which includes referral to an appropriate professional, for example, the  
55 GP. Local pathways should be established to manage this referral. However, because the prevalence of  
56  
57  
58  
59  
60

depressive symptoms is so high in low vision clinics, we recommend that low vision practitioners introduce depression screening as part of routine care with all patients.

Future research could include qualitative work to clarify the pathway from the risk factors identified here to the onset of depression, to aid the development of interventions for depression in this population.

## ACKNOWLEDGEMENTS

The authors wish to thank the following for data collection: Sandra Jumbe, Rowanne Black, Kathy Davies, Denise Banford, Ian Cousins, Huw Bellamy, Norma Davies, Ceri Goodman, Sharon Beatty, Lisa Evans, Leighton Griffiths, Matthew Harvey, David Jenkins, Jane Savage, Marek Karas, John Butler, Seema Rajoria, Rajiv Raja, Jane De Courcy, Ahalya Subramanian, Sonal Rughani and Sarah Janikoun.

## FOOTNOTES

**Contributors:** TM, DS, RTE and MS conceived the idea for the study and acquired funding. CN project managed the study, supervised data collection, performed data cleaning, statistical analysis and wrote the first draft of the manuscript. CB and BR substantially contributed to the design of the study and to the acquisition of data. NB and RC contributed to the design of the study. DG provided statistical advice and supervision. All authors contributed to the design of the protocol, critically reviewed the manuscript for important intellectual content and approved the final manuscript.

**Funding:** The work was supported by Guide Dogs grant number OR2009-07b.

**Competing interests:** None declared.

**Patient consent:** Not required – no identifiable information from a living individual included.

**Ethics approval:** The NHS South East Wales Research Ethics Committee Panel B approved this study.

**Data sharing statement:** There is no additional unpublished data from this study.

## REFERENCES

1. Christ SL, Zheng DD, Swenor BK, et al. Longitudinal relationships among visual acuity, daily functional status, and mortality: the Salisbury Eye Evaluation Study. *JAMA Ophthalmol* 2014;**132**(12):1400-6.
2. Court H, McLean G, Guthrie B, et al. Visual impairment is associated with physical and mental comorbidities in older adults: a cross-sectional study. *BMC Med* 2014;**12**:181.
3. Dargent-Molina P, Favier F, Grandjean H, et al. Fall-related factors and risk of hip fracture: the EPIDOS prospective study. *Lancet* 1996;**348**(9021):145-9.
4. Chou KL. Combined effect of vision and hearing impairment on depression in older adults: evidence from the English Longitudinal Study of Ageing. *J Affect Disord* 2008;**106**(1-2):191-6.
5. Evans JR, Fletcher AE, Wormald RP. Depression and anxiety in visually impaired older people. *Ophthalmology* 2007;**114**(2):283-8.

- 1
  - 2
  - 3
  - 4
  - 5
  - 6
  - 7
  - 8
  - 9
  - 10
  - 11
  - 12
  - 13
  - 14
  - 15
  - 16
  - 17
  - 18
  - 19
  - 20
  - 21
  - 22
  - 23
  - 24
  - 25
  - 26
  - 27
  - 28
  - 29
  - 30
  - 31
  - 32
  - 33
  - 34
  - 35
  - 36
  - 37
  - 38
  - 39
  - 40
  - 41
  - 42
  - 43
  - 44
  - 45
  - 46
  - 47
  - 48
  - 49
  - 50
  - 51
  - 52
  - 53
  - 54
  - 55
  - 56
  - 57
  - 58
  - 59
  - 60
6. Holloway EE, Sturrock BA, Lamoureux EL, et al. Depression screening among older adults attending low-vision rehabilitation and eye-care services: Characteristics of those who screen positive and client acceptability of screening. *Australas J Ageing* 2015;**34**(4):229-34.
7. Nollett CL, Bray N, Bunce C, et al. Depression in Visual Impairment Trial (DEPVIT): A Randomized Clinical Trial of Depression Treatments in People With Low Vision. *Invest Ophthalmol Vis Sci* 2016;**57**(10):4247-54.
8. Nollett CL, Bray N, Bunce C, et al. High Prevalence of Untreated Depression in Patients Accessing Low-Vision Services. *Ophthalmology* 2016;**123**(2):440-1.
9. Crawford MJ, Prince M, Menezes P, et al. The recognition and treatment of depression in older people in primary care. *Int J Geriatr Psychiatry* 1998;**13**(3):172-6.
10. MacDonald AJ. Do general practitioners "miss" depression in elderly patients? *Br Med J (Clin Res Ed)* 1986;**292**(6532):1365-7.
11. O'Connor DW, Rosewarne R, Bruce A. Depression in primary care. 2: general practitioners' recognition of major depression in elderly patients. *Int Psychogeriatr* 2001;**13**(3):367-74.
12. National Institute for Health and Care Excellence. Depression in adults with a chronic physical health problem: recognition and management. Clinical guideline [CG91]. 2009.
13. van der Aa HP, Xie J, Rees G, et al. Validated Prediction Model of Depression in Visually Impaired Older Adults. *Ophthalmology* 2016;**123**(5):1164-6.
14. Rees G, Xie J, Holloway EE, et al. Identifying distinct risk factors for vision-specific distress and depressive symptoms in people with vision impairment. *Invest Ophthalmol Vis Sci* 2013;**54**(12):7431-8.
15. Heesterbeek TJ, van der Aa HPA, van Rens G, et al. The incidence and predictors of depressive and anxiety symptoms in older adults with vision impairment: a longitudinal prospective cohort study. *Ophthalmic Physiol Opt* 2017;**37**(4):385-98.
16. Sheikh JI, Yesavage JA. Geriatric Depression Scale (GDS): Recent evidence and development of a shorter version. *Clinical Gerontologist: The Journal of Aging and Mental Health* 1986;**5**(1-2):165-73.
17. Bowling A. Just one question: If one question works, why ask several? *J Epidemiol Community Health* 2005;**59**(5):342-5.
18. Ryan B, Court H, Margrain TH. Measuring low vision service outcomes: Rasch analysis of the seven-item National Eye Institute Visual Function Questionnaire. *Optom Vis Sci* 2008;**85**(2):112-21.
19. Margrain TH, Nollett C, Shearn J, et al. The Depression in Visual Impairment Trial (DEPVIT): trial design and protocol. *BMC Psychiatry* 2012;**12**:57.
20. Heinze G, Wallisch C, Dunkler D. Variable selection - A review and recommendations for the practicing statistician. *Biometrical Journal* 2018;**60**(3):431-49.
21. Read JR, Sharpe L, Modini M, et al. Multimorbidity and depression: A systematic review and meta-analysis. *Journal of Affective Disorders* 2017;**221**:36-46.
22. Centre for Disease Control and Prevention. QuickStats: Prevalence of Current Depression\* Among Persons Aged ≥12 Years, by Age Group and Sex — United States, National Health and Nutrition Examination Survey, 2007–2010. Secondary QuickStats: Prevalence of Current Depression\* Among Persons Aged ≥12 Years, by Age Group and Sex — United States, National Health and Nutrition Examination Survey, 2007–2010 2012. <https://www.cdc.gov/mmwr/preview/mmwrhtml/mm6051a7.htm>. Accessed 21st June 2018.
23. Blanchflower DG, Oswald AJ. Is well-being U-shaped over the life cycle? *Social Science & Medicine* 2008;**66**(8):1733-49.
24. Hayman KJ, Kerse NM, La Grow SJ, et al. Depression in older people: visual impairment and subjective ratings of health. *Optom Vis Sci* 2007;**84**(11):1024-30.
25. Williamson G, Shaffer D. The Activity restriction Model of Depressed Affect. In: Williamson G, Shaffer D, Parmelee P, eds. *Physical Illness and Depression in Older Adults*: Kluwer Academic Publishers, 2000.
26. Tabrett DR, Latham K. Factors influencing self-reported vision-related activity limitation in the visually impaired. *Invest Ophthalmol Vis Sci* 2011;**52**(8):5293-302.
27. Altman DG, Royston P. Statistics notes - The cost of dichotomising continuous variables. *British Medical Journal* 2006;**332**(7549):1080-80.

1  
2  
3  
4  
5  
6  
7  
8  
9  
10  
11  
12  
13  
14  
15  
16  
17  
18  
19  
20  
21  
22  
23  
24  
25  
26  
27  
28  
29  
30  
31  
32  
33  
34  
35  
36  
37  
38  
39  
40  
41  
42  
43  
44  
45  
46  
47  
48  
49  
50  
51  
52  
53  
54  
55  
56  
57  
58  
59  
60

For peer review only



**STROBE 2007 (v4) Statement—Checklist of items that should be included in reports of *cross-sectional studies* (Nollett et al)**

| Section/Topic                | Item # | Recommendation                                                                                                                                                                       | Reported on page # |
|------------------------------|--------|--------------------------------------------------------------------------------------------------------------------------------------------------------------------------------------|--------------------|
| <b>Title and abstract</b>    | 1      | (a) Indicate the study's design with a commonly used term in the title or the abstract                                                                                               | 1                  |
|                              |        | (b) Provide in the abstract an informative and balanced summary of what was done and what was found                                                                                  | 2                  |
| <b>Introduction</b>          |        |                                                                                                                                                                                      |                    |
| Background/rationale         | 2      | Explain the scientific background and rationale for the investigation being reported                                                                                                 | 4                  |
| Objectives                   | 3      | State specific objectives, including any prespecified hypotheses                                                                                                                     | 5                  |
| <b>Methods</b>               |        |                                                                                                                                                                                      |                    |
| Study design                 | 4      | Present key elements of study design early in the paper                                                                                                                              | 5                  |
| Setting                      | 5      | Describe the setting, locations, and relevant dates, including periods of recruitment, exposure, follow-up, and data collection                                                      | 5                  |
| Participants                 | 6      | (a) Give the eligibility criteria, and the sources and methods of selection of participants                                                                                          | 5                  |
| Variables                    | 7      | Clearly define all outcomes, exposures, predictors, potential confounders, and effect modifiers. Give diagnostic criteria, if applicable                                             | 6                  |
| Data sources/<br>measurement | 8*     | For each variable of interest, give sources of data and details of methods of assessment (measurement). Describe comparability of assessment methods if there is more than one group | 6, 7               |
| Bias                         | 9      | Describe any efforts to address potential sources of bias                                                                                                                            | 7                  |
| Study size                   | 10     | Explain how the study size was arrived at                                                                                                                                            | -                  |
| Quantitative variables       | 11     | Explain how quantitative variables were handled in the analyses. If applicable, describe which groupings were chosen and why                                                         | 7, 8               |
| Statistical methods          | 12     | (a) Describe all statistical methods, including those used to control for confounding                                                                                                | 8                  |
|                              |        | (b) Describe any methods used to examine subgroups and interactions                                                                                                                  | 8                  |
|                              |        | (c) Explain how missing data were addressed                                                                                                                                          | 8                  |
|                              |        | (d) If applicable, describe analytical methods taking account of sampling strategy                                                                                                   | 8                  |
|                              |        | (e) Describe any sensitivity analyses                                                                                                                                                | -                  |
| <b>Results</b>               |        |                                                                                                                                                                                      |                    |



|                          |     |                                                                                                                                                                                                              |           |
|--------------------------|-----|--------------------------------------------------------------------------------------------------------------------------------------------------------------------------------------------------------------|-----------|
| Participants             | 13* | (a) Report numbers of individuals at each stage of study—eg numbers potentially eligible, examined for eligibility, confirmed eligible, included in the study, completing follow-up, and analysed            | 8         |
|                          |     | (b) Give reasons for non-participation at each stage                                                                                                                                                         | 8         |
|                          |     | (c) Consider use of a flow diagram                                                                                                                                                                           | -         |
| Descriptive data         | 14* | (a) Give characteristics of study participants (eg demographic, clinical, social) and information on exposures and potential confounders                                                                     | 9, 10, 11 |
|                          |     | (b) Indicate number of participants with missing data for each variable of interest                                                                                                                          | 9, 10, 11 |
| Outcome data             | 15* | Report numbers of outcome events or summary measures                                                                                                                                                         | 9-13      |
| Main results             | 16  | (a) Give unadjusted estimates and, if applicable, confounder-adjusted estimates and their precision (eg, 95% confidence interval). Make clear which confounders were adjusted for and why they were included | 9-13      |
|                          |     | (b) Report category boundaries when continuous variables were categorized                                                                                                                                    | 6         |
|                          |     | (c) If relevant, consider translating estimates of relative risk into absolute risk for a meaningful time period                                                                                             | -         |
| Other analyses           | 17  | Report other analyses done—eg analyses of subgroups and interactions, and sensitivity analyses                                                                                                               | -         |
| <b>Discussion</b>        |     |                                                                                                                                                                                                              |           |
| Key results              | 18  | Summarise key results with reference to study objectives                                                                                                                                                     | 16        |
| Limitations              | 19  | Discuss limitations of the study, taking into account sources of potential bias or imprecision. Discuss both direction and magnitude of any potential bias                                                   | 18        |
| Interpretation           | 20  | Give a cautious overall interpretation of results considering objectives, limitations, multiplicity of analyses, results from similar studies, and other relevant evidence                                   | 16-18     |
| Generalisability         | 21  | Discuss the generalisability (external validity) of the study results                                                                                                                                        | 17/18     |
| <b>Other information</b> |     |                                                                                                                                                                                                              |           |
| Funding                  | 22  | Give the source of funding and the role of the funders for the present study and, if applicable, for the original study on which the present article is based                                                | 19        |

\*Give information separately for cases and controls in case-control studies and, if applicable, for exposed and unexposed groups in cohort and cross-sectional studies.

**Note:** An Explanation and Elaboration article discusses each checklist item and gives methodological background and published examples of transparent reporting. The STROBE checklist is best used in conjunction with this article (freely available on the Web sites of PLoS Medicine at <http://www.plosmedicine.org/>, Annals of Internal Medicine at <http://www.annals.org/>, and Epidemiology at <http://www.epidem.com/>). Information on the STROBE Initiative is available at [www.strobe-statement.org](http://www.strobe-statement.org).

# BMJ Open

## Depressive symptoms in people with a vision impairment: A cross-sectional study to identify who is most at risk

|                                 |                                                                                                                                                                                                                                                                                                                                                                                                                                                                                                                                                                                                                                                                                                                                                                                                               |
|---------------------------------|---------------------------------------------------------------------------------------------------------------------------------------------------------------------------------------------------------------------------------------------------------------------------------------------------------------------------------------------------------------------------------------------------------------------------------------------------------------------------------------------------------------------------------------------------------------------------------------------------------------------------------------------------------------------------------------------------------------------------------------------------------------------------------------------------------------|
| Journal:                        | <i>BMJ Open</i>                                                                                                                                                                                                                                                                                                                                                                                                                                                                                                                                                                                                                                                                                                                                                                                               |
| Manuscript ID                   | bmjopen-2018-026163.R2                                                                                                                                                                                                                                                                                                                                                                                                                                                                                                                                                                                                                                                                                                                                                                                        |
| Article Type:                   | Research                                                                                                                                                                                                                                                                                                                                                                                                                                                                                                                                                                                                                                                                                                                                                                                                      |
| Date Submitted by the Author:   | 26-Nov-2018                                                                                                                                                                                                                                                                                                                                                                                                                                                                                                                                                                                                                                                                                                                                                                                                   |
| Complete List of Authors:       | Nollett, Claire; Cardiff University, Centre for Trials Research<br>Ryan, Barbara; Cardiff University, School of Optometry and Vision Sciences<br>Bray, Nathan; Centre for Health Economics and Medicines Evaluation, Bangor University,<br>Bunce, Catey; kings College london, School of Population and Environmental Sciences<br>Casten, Robin; Thomas Jefferson University, Department of Psychiatry and Human Behaviour<br>Edwards, Rhiannon; Bangor University, Centre for Health Economics & Medicines Evaluation<br>Gillespie, David; Cardiff University, Centre for Trials Research<br>Smith, Daniel; University of Glasgow, Institute of Health and Wellbeing<br>Stanford, Miles; St Thomas' Hospital, Medical Eye Unit<br>Margrain, Tom; Cardiff University, School of Optometry and Vision Sciences |
| <b>Primary Subject Heading</b>: | Ophthalmology                                                                                                                                                                                                                                                                                                                                                                                                                                                                                                                                                                                                                                                                                                                                                                                                 |
| Secondary Subject Heading:      | Mental health                                                                                                                                                                                                                                                                                                                                                                                                                                                                                                                                                                                                                                                                                                                                                                                                 |
| Keywords:                       | Depression & mood disorders < PSYCHIATRY, GERIATRIC MEDICINE, OPHTHALMOLOGY                                                                                                                                                                                                                                                                                                                                                                                                                                                                                                                                                                                                                                                                                                                                   |
|                                 |                                                                                                                                                                                                                                                                                                                                                                                                                                                                                                                                                                                                                                                                                                                                                                                                               |

SCHOLARONE™  
Manuscripts

1  
2  
3 **Depressive symptoms in people with a vision impairment: A cross-sectional study to identify who**  
4 **is most at risk**  
5  
6  
7  
8  
9

10 Claire Nollett, Centre for Trials Research, College of Biomedical & Life Sciences, Cardiff University,  
11 4th Floor, Neuadd Meirionnydd, Heath Park, Cardiff, CF14 4YS, UK. [nollettcl@cardiff.ac.uk](mailto:nollettcl@cardiff.ac.uk) 02920  
12 687 187\*  
13  
14

15  
16 Barbara Ryan, School of Optometry and Vision Sciences, Cardiff University, Cardiff, UK  
17

18  
19 Nathan Bray, Centre for Health Economics and Medicines Evaluation, Bangor University, Bangor, UK  
20

21 Catey Bunce, School of Population Health and Environmental Sciences, King's College London,  
22 London, UK  
23

24  
25 Robin Casten, Department of Psychiatry and Human Behavior, Sidney Kimmel Medical College at  
26 Thomas Jefferson University, Philadelphia, USA  
27

28  
29 Rhiannon T. Edwards, Centre for Health Economics and Medicines Evaluation, Bangor University,  
30 Bangor, UK  
31

32  
33 David Gillespie, Centre for Trials Research, Cardiff University, Cardiff, UK  
34

35  
36 Daniel J. Smith, Institute of Health and Wellbeing, University of Glasgow, Glasgow, UK  
37

38  
39 Miles Stanford, Medical Eye Unit, St Thomas' Hospital, London, UK  
40

41  
42 Tom H. Margrain, School of Optometry and Vision Sciences, Cardiff University, Cardiff, UK  
43

44 \*Corresponding author  
45  
46  
47  
48  
49  
50  
51  
52  
53  
54  
55  
56  
57  
58  
59  
60

## ABSTRACT

**Objective:** To identify the risk factors for significant depressive symptoms in people with visual impairment in England and Wales to provide information on who is most at risk and to whom support services could be targeted in future.

**Design:** A cross-sectional study using baseline data from a pragmatic randomised controlled trial.

**Setting and Participants:** 990 participants aged 18 or over attending one of fourteen low vision rehabilitation primary care optometry based clinics in South Wales or two hospital clinics in London.

**Outcome measure:** A score of  $\geq 6$  on the Geriatric Depression Scale (GDS-15) was classed as clinically significant depressive symptoms.

**Results:** In a multivariable logistic regression model, significant depressive symptoms were associated with age (adjusted odds ratio (AOR) = 0.82, 95%CI: 0.66 to 0.90,  $p < 0.001$ ), ethnicity (AOR non-white compared to white = 1.72, 95%CI: 1.05 to 2.81,  $P = 0.031$ ), total number of eye conditions (AOR for two versus one condition = 0.98, 95%CI: 0.67 to 1.43; three or more versus one condition = 0.34, 95%CI: 0.15 to 0.75,  $p = 0.026$ ), self-reported health (AOR for excellent versus poor = 0.01, 95%CI: 0.00 to 0.12; very good versus poor = 0.06, 95%CI: 0.03 to 0.13; good versus poor = 0.14, 95%CI: 0.08 to 0.24; fair versus poor = 0.28, 95%CI: 0.18 to 0.46,  $p < 0.001$ ) and self-reported visual functioning (AOR = 1.45, 95%CI: 1.31 to 1.61,  $p < 0.001$ ).

**Conclusion:** Younger age, a non-white ethnicity, fewer eye conditions and poorer self-reported health and visual function are risk factors for significant depressive symptoms in this population.

**Trial registration:** ISRCTN46824140

## KEYWORDS

depression, vision impairment, sight loss, risk factor, depressive symptoms

## ARTICLE SUMMARY

### Strengths and Limitations of the Study

- This is the first study of risk factors for depressive symptoms in people seeking help for vision impairment in England and Wales.
- It benefits from a large sample size (n=990) and a high response rate (n=990/1323, 74.8%) which increase the generalisability of the findings.
- It examines factors which can be readily assessed by practitioners in primary care and general hospital clinics who come into contact with people with vision impairment, enabling them to be alerted to those most at risk and in need of signposting to support services.
- However, it excludes some more difficult to measure factors, such as vision specific distress, coping style and perceived social support, which may also predict depression in this population.
- The study uses a cross-sectional design so conclusions about direction of causality cannot be made.

## BACKGROUND

Vision impairment impacts on all aspects of life and is associated with reduced functional ability, falls, social isolation and reduced quality-of-life.<sup>1-3</sup> There is also a growing awareness that it has a negative impact on mental health status too. Population based studies provide robust evidence of an association between vision impairment and depression. Typically those with a vision impairment are 2 to 3 times more likely to be depressed.<sup>4 5</sup> In Britain, for example, a large survey of >13,000 older adults found that the prevalence of significant depressive symptoms in those with good vision living in the community was about 4.6% while in those with a vision impairment (<6/18) it was 13.5%.<sup>5</sup>

The prevalence of significant depressive symptoms is also high in those accessing rehabilitation services. Results from a study in Australia found that when screened with the two item Patient Health Questionnaire (PHQ-2), 37% of patients attending rehabilitation clinics or eye care services screened positive for depressive symptoms.<sup>6</sup> Here in the UK, we screened over 1000 patients attending low vision rehabilitation appointments using the Geriatric Depression Scale (GDS-15), as part of the Depression in Visual Impairment Trial (DEPVIT), a randomised controlled trial.<sup>7</sup> We found that 43% of patients reported significant depressive symptoms (score  $\geq 6$ ) and, significantly, 74.8% were not receiving any treatment for depression.<sup>8</sup> This finding supports previous reports that people with a vision impairment are less likely to have their depression identified than those with good vision.<sup>9-11</sup>

Because depression goes under-detected in this patient group, there is a need to improve routine screening. The National Institute for Health and Care Excellence (NICE), in their guidelines on 'Depression in adults with a chronic physical health problem'<sup>12</sup> suggest that practitioners working in primary care and general hospital clinics should be aware that patients with a chronic physical health problem, especially those with functional impairment, are at a high risk of depression. They recommend being alert to possible depression and asking two simple screening questions to detect depression.<sup>12</sup> Those screening positively should be referred to an appropriate professional for assessment, in most cases, the patient's General Practitioner (GP). Screening should occur in both low vision specific settings such as rehabilitation clinics, and in primary care and general clinical settings such as diabetes or stroke clinics, where vision impairment is prevalent. In busy primary care and general clinics, understanding who is most at risk of depression amongst this patient group using easy to determine factors may help clinicians to target depression screening and signpost patients to supportive services.

Previous cross-sectional studies of patients from outpatient eye clinics and low vision rehabilitation services have identified several risk factors for depression including: being female, being relatively younger in age, living alone and having lower acceptance of vision loss<sup>13</sup>, reporting poorer self-reported health and having a history of mental health problems,<sup>13 14</sup> reporting poorer vision specific functioning, higher levels of vision

1  
2  
3 specific distress, having an avoidant coping style and lower perceived adequacy of social support<sup>14</sup>. A  
4 longitudinal prospective cohort study of 540 patients from outpatient low vision organisations in the  
5 Netherlands and Belgium found that people who developed depressive symptoms over a two year period were  
6 more likely to be: living alone, having just enough money to cover their expenses, have macular degeneration,  
7 have problems with adaptation to vision loss, have reduced health related quality of life and be experiencing  
8 symptoms of anxiety.<sup>15</sup>  
9  
10  
11  
12

13  
14 The above studies were conducted in the Netherlands, Belgium and Australia and we do not know if the same  
15 risk factors apply to a British population. Therefore, it is useful to examine the risk factors for depressive  
16 symptoms in people with sight loss in England and Wales, using a large sample of consecutive attendees to  
17 services. The findings will enable clinicians in primary care and general hospital clinics to allocate resources to  
18 screening those most at risk.  
19  
20  
21  
22

23 The aim of this study was to identify the risk factors for significant depressive symptoms in people with vision  
24 impairment attending rehabilitation clinics in England and Wales using baseline data from a randomised  
25 controlled trial of interventions for depression (DEPVIT).<sup>7</sup> We focused our examination mainly on  
26 characteristics which can be easily identified in routine practice for example, age and ethnicity, to provide a  
27 straightforward approach to identifying high risk patients based on readily available information.  
28  
29  
30  
31  
32  
33

## 34 **METHODS**

### 35 **Study Design and Participants**

36  
37 This cross-sectional study was undertaken as part of the Depression in Visual Impairment Trial (DEPVIT).<sup>7</sup>  
38 Eligible participants were consecutive adult patients who were seeking help for vision impairment at specialist  
39 visual rehabilitation services taking part in DEPVIT. Fourteen primary care based rehabilitation services  
40 recruited participants in South Wales. Services were readily accessible high street practices, accepted self-  
41 referral and tended to cater to older adults with age-related eye conditions living in the local community. A  
42 secondary care rehabilitation clinic based at Guys and St Thomas' Hospital and an NHS outreach clinic  
43 providing low vision services in Southwark recruited participants from the London area. Access to these two  
44 specialist clinics was by referral only. All consecutive attendees aged 18 or over were considered eligible for  
45 the study, unless they lived outside the catchment area for the trial or if they had previously been screened  
46 for depression as part of the study (some people had more than one appointment during the length of the  
47 study, but we only wanted to screen them and invite them to take part once). Ethical approval was obtained  
48 from the NHS South East Wales Research Ethics Committee Panel B. All participants provided written informed  
49 consent for their anonymised data to be used and the study adhered to the Declaration of Helsinki.  
50  
51  
52  
53  
54  
55  
56  
57  
58  
59  
60

## Funding and Public and Patient Involvement

The study was funded by Guide Dogs, a voluntary sector organisation who work closely with people with vision impairment and understand their experiences and preferences. They carried out a review prior to funding to ensure the research questions were relevant and the study design appropriate. Patients with a vision impairment reviewed and provided feedback on the depression questionnaire. Patients were not involved in the recruitment to or conduct of the study.

## Measures

### Depression

The Geriatric Depression Scale (GDS-15)<sup>16</sup> is one of the most widely used instruments for the screening of depression in older adults. The questionnaire has 15 questions and completion time is approximately 5 minutes. Possible scores range from 0 to 15, with higher scores indicating a greater number of depressive symptoms. We chose to use dichotomous categories rather than the continuous scale as this reflects the scale's use in clinical practice as a screening tool to identify those who warrant further investigation. We used the conventional scoring approach rather than Rasch analysis to facilitate direct comparison with published studies and to facilitate clinically valid results. A score of 6 or more was taken to be indicative of significant depressive symptoms<sup>5</sup>.

### Risk Factors

We recorded gender, age, ethnicity (White, Asian/Asian British, Black/Black British or Other), physical illness (number and type from a list of seven plus an 'other' category) and ocular diagnosis (number and type of eye conditions from a list of five plus an 'other' category), factors which would be readily available to clinicians working with people with sight loss and have been considered in previous studies.

We also measured self-reported general health as this has consistently been shown to be a risk factor for depression<sup>6 13-15</sup> and can be easily measured using a single item question from the SF-12, "In general, would you say your overall health is: excellent, very good, good, fair or poor?". The question has had widespread use as a single-item measure, including in previous studies of visual impairment and depression<sup>5 14</sup> and has shown to be significantly and independently associated with specific health problems, use of health services, changes in functional status, recovery from episodes of ill health, mortality, and sociodemographic characteristics of respondents.<sup>17</sup>

To provide information on vision related factors for low vision practitioners who have access to this information, we also measured presenting corrected binocular visual acuity using ETDRS LogMAR and recorded time since vision loss in years. As previous studies have found no evidence of an association between



1  
2  
3 objective measures of visual acuity and depression<sup>13-15</sup>, we were interested to see whether a subjective  
4 measure of visual function would be associated. Self-reported visual functioning was measured using the 7  
5 item National Eye Institute Visual Function Questionnaire (NEI-VFQ 7) which includes a subset of questions  
6 from the National Eye Institute Visual Function Questionnaire that have previously been shown to be  
7 responsive to rehabilitation service intervention.<sup>18</sup> As the NEI-VFQ 7 is commonly reported in the published  
8 literature with Rasch analysis, we transformed the Likert responses using the Rasch derived scoring key  
9 provided by Ryan et al (2008)<sup>18</sup> to calculate a score for each completed questionnaire. A higher score indicates  
10 a greater perceived difficulty with visual functioning. Questionnaires with 3 or more missing items were  
11 counted as missing and excluded from the analysis.  
12  
13  
14  
15  
16  
17

### 18 19 **Procedures**

20  
21 Participants who were eligible to take part in the study were sent a questionnaire in large print format  
22 containing the GDS-15, NEI-VFQ 7 and single-item question about health, along with their appointment letter  
23 at least one week before their low vision assessment. They were asked to complete the questionnaire at home,  
24 with assistance if needed, and to bring it along to their appointment. Those who did not return a completed  
25 questionnaire were given the opportunity to complete another copy at the clinic, before their appointment.  
26 The low vision practitioner reviewed the participant's responses with them at the start of the assessment and  
27 asked for their written consent to use their anonymised responses in the study. For those who consented,  
28 information on gender, date of birth, ethnicity, physical illness, ocular diagnosis, corrected ETDRS Log MAR  
29 acuity and time since vision loss first identified were recorded on a Case Report Form (CRF). Those who  
30 screened positive for depressive symptoms (GDS-15 score of  $\geq 6$ ) were offered entry to the DEPVIT trial if  
31 eligible, or a referral to their GP if not eligible.<sup>19</sup>  
32  
33  
34  
35  
36  
37  
38  
39

40 Case Report Forms completed by the clinicians were sent to the research coordinating centre at Cardiff  
41 University by secure FAX where the validity and completeness of the data was checked. Any missing or out of  
42 range data were queried with the practitioner and checked with clinical notes. Five percent of all CRFs and  
43 surveys were double entered. The error rate was less than 2% and identified errors were corrected. The  
44 number of eligible patients who did not complete the survey and the number who did not consent for their  
45 data to be used for research purposes were also recorded. The final dataset was then locked and transferred  
46 to the statistical team for analysis. The descriptive statistics were tabulated using SPSS Version 23 and the  
47 regression models were fitted using STATA Version 13.1.  
48  
49  
50  
51  
52  
53

### 54 55 **Statistical analysis**

56 Participant characteristics were summarised for those with significant depressive symptoms (GDS-15  $\geq 6$ ) and  
57 those without (GDS-15  $< 6$ ). Categorical variables were summarised as numbers and percentages and  
58  
59  
60

1  
2  
3 continuous variables as medians with interquartile ranges. In all cases we report the number of participants  
4 for whom data was missing.  
5  
6

7 Where the GDS-15 was not fully completed, completed answers were totalled to give a final score provided  
8 that the number of questions not answered was 2 or less<sup>5</sup>. If 3 or more questions were unanswered, the GDS-  
9 15 data were regarded as missing and the participant excluded from the analysis.  
10  
11

12  
13 Logistic regression was used to determine the independent relationship between each of the potential risk  
14 factors and significant depressive symptoms. The potential risk factors were initially included individually  
15 (univariable analysis) and then entered into a multivariable logistic regression analyses in blocks to determine  
16 which variables remain associated with significant depressive symptoms after controlling for the other factors.  
17 The events-per-variable was sufficient to allow inclusion of all potential risk factors, so no selection was  
18 required.<sup>20</sup> However, due to co-linearity, it was not possible to include both number and type of physical  
19 illnesses or both number and type of eye conditions. Therefore, a decision was made to include only number  
20 of illnesses and eye conditions, as it was hypothesized that burden of multiple diagnoses would be more  
21 important than type of diagnosis: those with multiple morbidity are at twice the risk of depression than those  
22 without multiple morbidity.<sup>21</sup> The variables were entered into the analysis in blocks, starting with the risk  
23 factors which could be most easily identified in routine clinics, and ending with those requiring more time or  
24 adaptation to practice to assess. The blocks were: 1) Demographics (gender/age/ethnicity), 2) Demographics  
25 and Physical Health (number of illnesses), 3) Demographics, Physical health and Eye health (number of eye  
26 conditions/visual acuity/time since vision loss), 4) Demographics, Physical Health, Eye health and Self-report  
27 measures (self-report health/visual functioning). We calculated the area under the ROC curve to quantify the  
28 overall ability of each (additional) block of variables to correctly discriminate between those with and without  
29 depression.  
30  
31  
32  
33  
34  
35  
36  
37  
38  
39  
40  
41  
42  
43  
44

## 45 RESULTS

46  
47 A total of 1323 consecutive adult patients attended the low vision rehabilitation clinics during the 30 month  
48 recruitment period. Of these, 312 were not screened for depression because the practitioner felt it was  
49 inappropriate at the time (because the patient was too ill, had dementia or was recently bereaved); or the  
50 patient had forgotten to complete the questionnaire and there was no time at the assessment; or they did not  
51 consent for their data to be used for research. An additional 21 patients had 3 or more missing items on the  
52 GDS-15 and were excluded, leaving a final sample size of 990 and a complete response rate of 74.8%. The  
53 median age of the participants was 79.0 years (IQR= 66.0 to 85.0), 62.2% were female (n=616) and 85% were  
54 white (n= 842). The overall prevalence of significant depressive symptoms was 42.5%. This varies very slightly  
55  
56  
57  
58  
59  
60

from our previously reported study (43%)<sup>8</sup> due to the methodology used in this study to calculate the total GDS-15 score (excluding those with  $\geq 3$  missing items).

Tables 1-4. outline the demographic characteristics of the participants, their physical health measures, eye health measures and self-report health and vision measures respectively, split by those with and without significant depressive symptoms. They also summarise the results of the univariable logistic regression using odds ratios (OR) presented with 95% confidence intervals (CI) and P values. The variables ethnicity, number of physical illnesses and number of eye conditions had a small number of participants in some categories, hence the categories were collapsed before being entered into the regression analysis. Both the original and collapsed categories are presented in the tables. Table 5 Summarises the results of the multivariable logistic regression using adjusted odds ratios (AOR) and are presented with 95% confidence intervals (CI) and P values.

*Table 1. Summarises the demographic characteristics of those with and without significant depressive symptoms*

| Demographic Characteristics | GDS-15 Score <6   | GDS-15 Score $\geq 6$ | Total             | Univariable logistic regression analysis          |      |              |         |
|-----------------------------|-------------------|-----------------------|-------------------|---------------------------------------------------|------|--------------|---------|
|                             |                   |                       |                   | N                                                 | OR   | 95% CI       | P Value |
| Total Sample, n (%)         | 569 (57.5%)       | 421 (42.5%)           | 990               |                                                   |      |              |         |
| Gender, n (%)               |                   |                       |                   |                                                   |      |              |         |
| Male <sup>^</sup>           | 201 (53.7%)       | 173 (46.3%)           | 374               | 990                                               | 0.78 | 0.60 to 1.01 | 0.064   |
| Female                      | 368 (59.7%)       | 248 (40.3%)           | 616               |                                                   |      |              |         |
| Data missing                | 0                 | 0                     | 0                 |                                                   |      |              |         |
| Age (years), Median (IQR)   | 80.0 (72.0, 86.0) | 77.0 (57.0, 85.0)     | 79.0 (66.0, 85.0) | 948                                               | 0.82 | 0.74 to 0.90 | <0.001  |
| Data missing, n (%)         | 22 (52.4%)        | 20 (47.6%)            | 42                |                                                   |      |              |         |
| Ethnicity, n (%)            |                   |                       |                   | Not entered into regression analysis <sup>~</sup> |      |              |         |
| White                       | 508 (60.3%)       | 334 (39.7%)           | 842               |                                                   |      |              |         |
| Asian/Asian/British         | 12 (52.2%)        | 11 (47.8%)            | 23                |                                                   |      |              |         |
| Black/Black British         | 40 (38.5%)        | 64 (61.5%)            | 104               |                                                   |      |              |         |
| Other ethnic group          | 9 (45%)           | 11 (55%)              | 20                |                                                   |      |              |         |
| Data missing                | 0 (0%)            | 1 (100%)              | 1                 |                                                   |      |              |         |
| Ethnicity (collapsed), n(%) |                   |                       |                   |                                                   |      |              |         |
| White <sup>^</sup>          | 508 (60.3%)       | 334 (39.7%)           | 842               | 989                                               | 2.14 | 1.50 to 3.06 | <0.001  |
| Non-White                   | 61 (41.5%)        | 86 (58.5%)            | 147               |                                                   |      |              |         |
| Data missing                | 0 (0%)            | 1 (100%)              | 1                 |                                                   |      |              |         |

<sup>^</sup>Reference category   <sup>~</sup>Collapsed categories entered instead

Table 2. Summarises the physical health of those with and without significant depressive symptoms

| Physical health                                                     | GDS-15<br>Score <6 | GDS-15<br>Score ≥6 | Total | Univariable logistic regression<br>analysis          |      |              |         |
|---------------------------------------------------------------------|--------------------|--------------------|-------|------------------------------------------------------|------|--------------|---------|
|                                                                     |                    |                    |       | N                                                    | OR   | 95% CI       | P Value |
| Physical Illnesses*, n (%)                                          |                    |                    |       |                                                      |      |              |         |
| Diabetes                                                            | 119 (47.8%)        | 130 (52.2%)        | 249   | Not entered into regression analysis <sup>†</sup>    |      |              |         |
| Epilepsy                                                            | 8 (57.1%)          | 6 (42.9%)          | 14    |                                                      |      |              |         |
| Stroke                                                              | 31 (50.8%)         | 30 (49.2%)         | 61    |                                                      |      |              |         |
| Thyroid                                                             | 27 (47.4%)         | 30 (52.6%)         | 57    |                                                      |      |              |         |
| Heart Disease                                                       | 94 (50.3%)         | 93 (49.7%)         | 187   |                                                      |      |              |         |
| High Blood Pressure                                                 | 246 (55.5%)        | 197 (44.5%)        | 443   |                                                      |      |              |         |
| Respiratory Disease                                                 | 48 (59.3%)         | 33 (40.7%)         | 81    |                                                      |      |              |         |
| Other                                                               | 113 (48.9%)        | 118 (51.1%)        | 231   |                                                      |      |              |         |
| No medical illness                                                  | 113 (70.2%)        | 48 (29.8%)         | 161   |                                                      |      |              |         |
| Data missing                                                        | 4 (100%)           | 0 (0%)             | 4     |                                                      |      |              |         |
| Total number of<br>physical illnesses, n (%)                        |                    |                    |       |                                                      |      |              |         |
| 0                                                                   | 113 (70.2%)        | 48 (29.8%)         | 161   | Not entered into regression<br>analysis <sup>~</sup> |      |              |         |
| 1                                                                   | 277 (60.6%)        | 180 (39.4%)        | 457   |                                                      |      |              |         |
| 2                                                                   | 127 (48.3%)        | 136 (51.7%)        | 263   |                                                      |      |              |         |
| 3                                                                   | 41 (47.7%)         | 45 (52.3%)         | 86    |                                                      |      |              |         |
| 4                                                                   | 4 (28.6%)          | 10 (71.4%)         | 14    |                                                      |      |              |         |
| 5                                                                   | 2 (50%)            | 2 (50%)            | 4     |                                                      |      |              |         |
| 6                                                                   | 1 (100%)           | 0 (0%)             | 1     |                                                      |      |              |         |
| Data missing                                                        | 4 (100%)           | 0 (0%)             | 4     |                                                      |      |              |         |
| Total number of physical illnesses<br>(collapsed categories), n (%) |                    |                    |       |                                                      |      |              |         |
| 0 <sup>^</sup>                                                      | 113 (70.2%)        | 48 (29.8%)         | 161   | 986                                                  | 1.53 | 1.04 to 2.25 | <0.001  |
| 1                                                                   | 277 (60.6%)        | 180 (39.4%)        | 457   |                                                      |      |              |         |
| 2                                                                   | 127 (48.3%)        | 136 (51.7%)        | 263   |                                                      |      |              |         |
| 3 or more                                                           | 48 (45.7%)         | 57 (54.3%)         | 105   |                                                      |      |              |         |
| Data missing                                                        | 4 (100%)           | 0 (0%)             | 4     |                                                      |      |              |         |

\* Participants may have had more than one physical illness <sup>†</sup>Not entered due to high correlation with number of physical illnesses <sup>~</sup>Collapsed categories entered instead <sup>^</sup>Reference category

Table 3. Summarises the eye health of those with and without significant depressive symptoms

| Eye health                                                     | GDS-15<br>Score <6 | GDS-15<br>Score ≥6 | Total               | Univariable logistic regression<br>analysis |      |              |         |
|----------------------------------------------------------------|--------------------|--------------------|---------------------|---------------------------------------------|------|--------------|---------|
|                                                                |                    |                    |                     | N                                           | OR   | 95% CI       | P Value |
| Ocular Diagnosis*, n (%)                                       |                    |                    |                     |                                             |      |              |         |
| AMD wet                                                        | 117 (59.4%)        | 80 (40.6%)         | 197                 |                                             |      |              |         |
| AMD dry                                                        | 259 (64.6%)        | 142 (35.4%)        | 401                 |                                             |      |              |         |
| Glaucoma                                                       | 104 (63.0%)        | 61 (37%)           | 165                 |                                             |      |              |         |
| Cataract                                                       | 95 (70.4%)         | 40 (29.6%)         | 135                 |                                             |      |              |         |
| Diabetic eye disease                                           | 59 (48.0%)         | 64 (52.0%)         | 123                 |                                             |      |              |         |
| Other eye condition                                            | 157 (47.9%)        | 171 (52.1%)        | 328                 |                                             |      |              |         |
| Data missing                                                   | 1 (50%)            | 1 (50%)            | 2                   |                                             |      |              |         |
| Total number<br>of eye conditions, n (%)                       |                    |                    |                     |                                             |      |              |         |
| 1                                                              | 381 (56%)          | 299 (44.0%)        | 680                 |                                             |      |              |         |
| 2                                                              | 153 (58.8%)        | 107 (41.2%)        | 260                 |                                             |      |              |         |
| 3                                                              | 32 (72.7%)         | 12 (27.3%)         | 44                  |                                             |      |              |         |
| 4                                                              | 2 (66.7%)          | 1 (33.3%)          | 3                   |                                             |      |              |         |
| 5                                                              | 0 (0%)             | 1 (100%)           | 1                   |                                             |      |              |         |
| Data missing                                                   | 1 (50%)            | 1 (50%)            | 2                   |                                             |      |              |         |
| Total number of eye<br>conditions (collapsed), n(%)            |                    |                    |                     |                                             |      |              |         |
| 1^                                                             | 381 (56.0%)        | 299 (44.0%)        | 680                 |                                             |      |              |         |
| 2                                                              | 153 (58.8%)        | 107 (41.2%)        | 260                 | 988                                         | 0.89 | 0.67 to 1.19 | 0.123   |
| 3 or more                                                      | 34 (70.8%)         | 14 (29.2%)         | 48                  |                                             | 0.52 | 0.28 to 1.00 |         |
| Data missing                                                   | 1 (50%)            | 1 (50%)            | 2                   |                                             |      |              |         |
| Corrected binocular<br>visual acuity (logMar),<br>Median (IQR) | 0.60 (0.40, 0.94)  | 0.70 (0.50, 1.00)  | 0.67<br>(0.40, 1.0) | 990                                         | 1.01 | 0.99 to 1.03 | 0.568   |
| Data missing, n (%)                                            | 0                  | 0                  | 0                   |                                             |      |              |         |
| Years since vision loss,<br>Median (IQR)                       | 5.5 (2.2, 12.0)    | 5.0 (2.1, 10.2)    | 5.2<br>(2.2, 11.1)  | 974                                         | 0.99 | 0.99 to 1.01 | 0.818   |
| Data missing, n (%)                                            | 13 (81.25%)        | 3 (18.75%)         | 16                  |                                             |      |              |         |

\* All ocular diagnoses - participants may have had more than one. ^Not entered due to high correlation with number of eye conditions ~Collapsed categories entered instead ^Reference category

Table 4. Summarises the self-reported health and visual function of those with and without significant depressive symptoms

| Self-report measures                             | GDS-15<br>Score <6               | GDS-15<br>Score ≥6              | Total                    | Univariable logistic regression<br>analysis |      |              |            |
|--------------------------------------------------|----------------------------------|---------------------------------|--------------------------|---------------------------------------------|------|--------------|------------|
|                                                  |                                  |                                 |                          | N                                           | OR   | 95%CI        | P<br>Value |
| Self-rated health<br>(SF-12), n (%)              |                                  |                                 |                          |                                             |      |              |            |
| Excellent                                        | 22 (95.7%)                       | 1 (4.3%)                        | 23                       | 952                                         | 0.01 | 0.00 to 0.08 | <0.001     |
| Very Good                                        | 93 (86.1%)                       | 15 (13.9%)                      | 108                      |                                             | 0.04 | 0.02 to 0.07 |            |
| Good                                             | 201 (72.6%)                      | 76 (27.4%)                      | 277                      |                                             | 0.09 | 0.05 to 0.14 |            |
| Fair                                             | 192 (52.5%)                      | 174 (47.5%)                     | 366                      |                                             | 0.21 | 0.13 to 0.32 |            |
| Poor <sup>^</sup>                                | 33 (18.5%)                       | 145 (81.5%)                     | 178                      |                                             |      |              |            |
| Data Missing                                     | 28 (73.7%)                       | 10 (26.3%)                      | 38                       |                                             |      |              |            |
| Visual functioning*<br>(NEI VFQ-7), Median (IQR) | 0.23 (-1.43, 1.46)<br>23 (67.6%) | 1.41 (0.17, 2.49)<br>11 (32.4%) | 0.78<br>(-0.80,<br>1.91) | 956                                         | 1.48 | 1.36 to 1.60 | <0.001     |
| Data missing n (%)                               |                                  |                                 | 34                       |                                             |      |              |            |

<sup>^</sup>Reference category \*NEI VFQ-7 scores have been Rasch analysed and a higher score indicates a greater perceived difficulty with visual functioning.

The variables ethnicity, number of physical illnesses and number of eye conditions had a small number of participants in some categories, hence the categories were collapsed before being entered into the regression analysis. Both the original and collapsed categories are presented in the tables. Table 5 Summarises the results of the multivariable logistic regression using odds ratios (OR) and adjusted odds ratios (AOR) and are presented with 95% confidence intervals (CI) and p values.

| Block                  | Characteristic                                          | Multivariable Block 1<br>N=947 |              |        | Multivariable Block 2<br>N=943 |              |        | Multivariable Block 3<br>N=926 |              |        | Multivariable Block 4<br>N=877 |              |        |
|------------------------|---------------------------------------------------------|--------------------------------|--------------|--------|--------------------------------|--------------|--------|--------------------------------|--------------|--------|--------------------------------|--------------|--------|
|                        |                                                         | AOR                            | 95% CI       | P      |
| 1. Demographics        | <b>Gender: Reference category male</b>                  |                                |              |        |                                |              |        |                                |              |        |                                |              |        |
|                        | • Female                                                | 0.87                           | 0.66 to 1.14 | 0.311  | 0.89                           | 0.67 to 1.17 | 0.390  | 0.90                           | 0.68 to 1.19 | 0.462  | 0.85                           | 0.61 to 1.19 | 0.350  |
|                        | <b>Age (per decade)</b>                                 | 0.82                           | 0.82 to 0.90 | <0.001 | 0.82                           | 0.74 to 0.90 | <0.001 | 0.82                           | 0.74 to 0.90 | <0.001 | 0.82                           | 0.66 to 0.90 | <0.001 |
|                        | <b>Ethnicity: Reference category white</b>              |                                |              |        |                                |              |        |                                |              |        |                                |              |        |
|                        | • Non-white                                             | 1.54                           | 1.05 to 2.27 | 0.027  | 1.64                           | 1.10 to 2.43 | 0.014  | 1.61                           | 1.08 to 2.40 | 0.020  | 1.72                           | 1.05 to 2.81 | 0.031  |
| 2. Physical Health     | <b>Total illnesses: Reference category 0 illness</b>    |                                |              |        |                                |              |        |                                |              |        |                                |              |        |
|                        | • 1 illness                                             |                                |              |        | 2.06                           | 1.34 to 3.18 | <0.001 | 2.09                           | 1.36 to 3.24 | <0.001 | 1.28                           | 0.77 to 2.13 | 0.051  |
|                        | • 2 illnesses                                           |                                |              |        | 3.55                           | 2.23 to 5.65 |        | 3.62                           | 2.26 to 5.78 |        | 1.96                           | 1.14 to 3.37 |        |
|                        | • 3 + illnesses                                         |                                |              |        | 3.91                           | 2.24 to 6.82 |        | 4.02                           | 2.27 to 7.11 |        | 1.68                           | 0.86 to 3.29 |        |
| 3. Eye Health          | <b>Total eye conditions: Reference category 1 cond.</b> |                                |              |        |                                |              |        |                                |              |        |                                |              |        |
|                        | • 2 conditions                                          |                                |              |        |                                |              |        | 0.91                           | 0.66 to 1.27 | 0.114  | 0.98                           | 0.67 to 1.43 | 0.026  |
|                        | • 3 + conditions                                        |                                |              |        |                                |              |        | 0.48                           | 0.24 to 0.96 |        | 0.34                           | 0.15 to 0.75 |        |
|                        | <b>Visual acuity</b>                                    |                                |              |        |                                |              |        | 1.00                           | 0.98 to 1.03 | 0.929  | 1.00                           | 0.97 to 1.03 | 0.942  |
|                        | <b>Time since vision loss (per year)</b>                |                                |              |        |                                |              |        | 0.99                           | 0.98 to 1.00 | 0.075  | 0.99                           | 0.98 to 1.00 | 0.244  |
| 4. Self-report Measure | <b>Subjective Health: Reference category poor</b>       |                                |              |        |                                |              |        |                                |              |        |                                |              |        |
|                        | • Excellent                                             |                                |              |        |                                |              |        |                                |              |        | 0.01                           | 0.00 to 0.12 | <0.001 |
|                        | • Very Good                                             |                                |              |        |                                |              |        |                                |              |        | 0.06                           | 0.03 to 0.13 |        |
|                        | • Good                                                  |                                |              |        |                                |              |        |                                |              |        | 0.14                           | 0.08 to 0.24 |        |
|                        | • Fair                                                  |                                |              |        |                                |              |        |                                |              |        | 0.28                           | 0.18 to 0.46 |        |
|                        | <b>Visual Functioning</b>                               |                                |              |        |                                |              |        |                                |              |        | 1.45                           | 1.31 to 1.61 | <0.001 |
| Area Under ROC Curve   |                                                         | 0.59                           |              |        | 0.65                           |              |        | 0.65                           |              |        | 0.81                           |              |        |

1 *Table 5. Summaries the results of the multivariable regression analyses, with blocks of variables added sequentially to the model.*

2  
3  
4  
5  
6  
7  
8  
9  
10  
11  
12  
13  
14  
15  
16  
17  
18  
19  
20  
21  
22  
23  
24  
25  
26  
27  
28  
29  
30  
31  
32  
33  
34  
35  
36  
37  
38  
39  
40  
41  
42  
43  
44  
45  
46

For peer review only



### Demographics

Table 1. Shows that those with a higher prevalence of significant depressive symptoms were male, younger or non-white. In the univariable analysis, age and ethnicity were associated with significant depressive symptoms. An increase in age was associated with lower odds of participants having depression and having ethnicity other than white was associated with higher odds of having depression. These variables remain associated once other variables were controlled for in the multivariable analysis final model (Table 5.). There was no evidence of an association between gender and significant depressive symptoms.

### Physical health

The prevalence of depression was lowest in those with no physical illness (29.8%) and highest in those with three or more illnesses (54.3% - Table 2.). In the univariable analysis, an increase in the number of physical illnesses was associated with higher odds of having significant depressive symptoms. This association remained when controlling for demographics and eye health but was no longer associated when controlling for subjective health and visual function.

### Eye health

Those with a higher prevalence of depression had one eye condition, worse visual acuity or less time since vision loss (Table 3.). The univariable analysis found no evidence of an association between significant depressive symptoms and number of eye conditions, visual acuity and time since vision loss. However, when controlling for other factors in the final model, an increase in the number of eye conditions was associated with lower odds of having significant depressive symptoms.

### Self-report measures

The prevalence of depression was highest in those with poor self-rated health (81.5%) and lowest in those with excellent health (4.3%). Those with significant depressive symptoms had worse self-rated visual functioning (Table 4.). Worse self-rated health and visual functioning were associated with higher odds of having significant depressive symptoms in both the univariable analysis and multivariable final model.

The area under the ROC curve was 0.59 when demographics alone were entered into the model, increasing to 0.65 when physical and eye health variables were considered, and reaching 0.81 when self-report measures were added.

## DISCUSSION

1  
2  
3 This study identified the risk factors for significant depressive symptoms in people with vision impairment  
4 attending vision rehabilitation clinics in England and Wales. We focused mainly on risk factors which can be  
5 easily identified in primary care and general hospital clinics, so as to provide a pragmatic approach to  
6 identifying high risk patients. To inform ophthalmic clinicians who may have access to more detailed  
7 information on eye health, we also included a range of vision related variables. Our findings showed that  
8 amongst older adults, those of relatively younger age, with an ethnicity other than white, and poorer self-  
9 reported health and visual function had higher odds of having significant depressive symptoms. Number of  
10 physical illnesses was an independent predictor of depressive symptoms, but there was no evidence of an  
11 association when controlling for subjective health and vision function. The number of eye conditions was not  
12 an independent predictor of depressive symptoms, but was related to depression when other variables were  
13 controlled: less number of eye conditions was associated with higher odds. There was no evidence that  
14 gender, time since vision loss and visual acuity were associated with depression.  
15  
16  
17  
18  
19  
20  
21  
22  
23

24 With regard to demographic factors, our findings demonstrate some support for, and discrepancies with,  
25 previous studies. In a study with an Australian population<sup>14</sup>, a univariate analysis provided evidence that  
26 younger age was associated with depressive symptoms, and in a European and Australian sample (relatively)  
27 younger age was shown to be associated with subthreshold depression in a multivariable analysis<sup>13</sup>. Our study  
28 corroborates these findings in a UK sample. This perhaps reflects the finding in the general population that  
29 people aged 40–59 years have higher rates of depression than those aged  $\geq 60$  years<sup>22</sup> and those in middle-age  
30 have the highest risk<sup>23</sup>. The reasons for this are not clearly understood, but one theory is that by mid-life,  
31 individuals have learnt to adapt to their strengths and weaknesses, and in mid-life ‘quell their infeasible  
32 aspirations’<sup>23</sup>. In those with vision loss, being affected in middle-age rather than old age may add to this sense  
33 of lost aspirations and could also result in more restriction in life including difficulties in finding and staying in  
34 work, playing sport etc. Our research found no evidence of an association between gender and depressive  
35 symptoms. Previous studies examining this association have differed in their findings. An Australian study  
36 showed no association in a univariate analysis<sup>14</sup>, whilst a model with a European and Australian sample found  
37 being female was a predictor of subthreshold depression<sup>13</sup>. The authors of a study with Dutch and Belgian  
38 participants reported that their findings on gender were inconclusive<sup>15</sup>. Differences in findings across the  
39 studies may indicate this factor is country specific, or may be due to differences in the measures used to assess  
40 depression. For example, we included people with all levels of depressive symptoms, whereas the  
41 European/Australian study included only subthreshold depression. It may be that being female is associated  
42 with subthreshold depression but there is no association when all levels of severity are considered. We found  
43 that having an ethnicity other than white was a risk factor. Recent studies on vision impairment and depression  
44 have not measured ethnicity, however an earlier study conducted in New Zealand found that ethnicity was  
45 not related to depression<sup>24</sup>. Differences between that study and ours may be due to the different populations,  
46  
47  
48  
49  
50  
51  
52  
53  
54  
55  
56  
57  
58  
59  
60

1  
2  
3 with a wider variation in ethnicities in the UK and London in particular. The New Zealand study only recorded  
4 'New Zealand born European' or 'other'. Therefore, future studies should include ethnicity as a variable to  
5 provide further clarification.  
6  
7

8  
9 There is more consistency between European and Australasian studies and our UK study in terms of health.  
10 We demonstrated that those with poorer self-reported health were at much higher risk of depressive  
11 symptoms. This confirms previous research in vision impaired people which has shown that poorer perceived  
12 health status<sup>13</sup>, poorer self-reported health<sup>14</sup> and poorer health related quality of life<sup>24</sup> are all predictors of  
13 depression. This is not surprising as patients may include their emotional health in a question about general  
14 health. Our study also found that a higher number of physical illnesses was an independent risk factor for  
15 depression. This is in line with findings from the non-vision impaired population. A recent meta-analysis found  
16 a substantial relationship between multimorbidity (the presence of two or more chronic physical illnesses) and  
17 depression, reporting that people with multimorbidity are at twice the risk of depression to those without  
18 multimorbidity, and nearly three times at risk compared to those with no chronic physical condition<sup>21</sup>. The  
19 authors suggest the relationship is bi-directional and cite the Activity Restriction Model of Depressed Affect<sup>25</sup>  
20 which explains that multimorbidity contributes significantly to depressive symptoms through having to give  
21 up valued activities due to physical limitations. In our sample, the limitations of conditions such as stroke and  
22 diabetes may have compounded any mobility and functional issues already caused by sight loss, which can  
23 make self-care, engaging in hobbies and getting out and about more difficult.  
24  
25

26  
27 In terms of vision related factors, it is logical to assume that the chances of having depressive symptoms  
28 increases as visual acuity decreases. However, in line with other European and Australian studies<sup>13-15</sup>, the  
29 results of the regression analysis do not support this hypothesis. What seems to be more important is self-  
30 reported visual function: those with worse self-reported visual function are more at risk of depressive  
31 symptoms<sup>26</sup>. Therefore clinicians should take care not to make assumptions about the likelihood of depression  
32 in only those with the lowest levels of vision as assessed by visual acuity. The relationship is likely to be  
33 bidirectional, with poorer visual function leading to loss of valued activities and mood, whilst lowered mood  
34 may influence a person's perception of their vision function. As with previous studies<sup>13-15</sup>, time since the vision  
35 loss was first identified was also not a predictor of depression, indicating that patients may develop symptoms  
36 at any point on their sight loss journey. The more surprising finding was that people with three or more eye  
37 conditions had lower odds of having significant depressive symptoms than those with just one eye condition.  
38 On consultation with the literature, we suggest this finding may be explained in terms of acceptance: lower  
39 acceptance of vision loss has shown to be a predictor of subthreshold depression<sup>13</sup>. In their work with people  
40 with diabetic eye disease and partial sight loss (some of whom also had glaucoma), Oehler-Giarratana and  
41 Fitzgerald report that patients described being in a state of "limbo" where they experienced uncertainty, fear  
42 and hope that vision might improve<sup>27</sup>. Perhaps surprisingly, they expressed the view that total loss of vision  
43  
44  
45  
46  
47  
48  
49  
50  
51  
52  
53  
54  
55  
56  
57  
58  
59  
60

1  
2  
3 would be a relief, as they could proceed through a healing phase and make plans for their future care. In our  
4 study, it is possible that those with three or more eye conditions had come to terms with the likelihood of  
5 further vision loss and reached a point of acceptance, whereas those with one eye condition were in the  
6 “limbo” phase, with the hope that sight may improve but the fear that it might deteriorate, and therefore not  
7 reached this point of acceptance thus increasing their risk of depressive symptoms. None of the studies  
8 referred to in our introduction included number of eye conditions as a risk factor, and we could not find any  
9 studies which included both number of eye conditions and level of acceptance. Therefore, further research is  
10 needed to better understand this finding and possible explanation. Our research suggests that not all of the  
11 factors related to depressive symptoms in people with vision impairment are specific to that particular  
12 population. As with the general population, age, ethnicity and health are associated with risk of depression  
13 and this needs to be taken into consideration when understanding the link between vision impairment and  
14 depression, and when considering suitable interventions.

15  
16  
17  
18  
19  
20  
21  
22  
23  
24 This research added to the literature by examining risk factors in a British sample of people with vision  
25 impairment. The study benefited from a large sample size and a high response rate, enhancing the  
26 generalisability of the findings. As we included 14 low vision rehabilitation clinics across primary and secondary  
27 care, we believe the findings are transferrable to both settings in the UK. Our study employed validated  
28 measures of depressive symptoms and incorporated risk factors which are easy to identify in primary care and  
29 hospital clinics. Therefore the results can be easily integrated in clinical practice to target screening.

30  
31  
32  
33  
34  
35 However, inevitably there were some value judgements in how we chose our criteria for selecting the range  
36 of potential factors in our study. This means that other parameters which have previously been shown to be  
37 predictors of depression, for example, vision specific distress, lower perceived adequacy of social support and  
38 avoidant coping<sup>14</sup>, were not measured and therefore cannot be included in the risk profile advice to clinicians.  
39 These parameters can only be assessed using additional questionnaires which would have increased the  
40 overall response burden in the study and furthermore, it is unlikely that these variables would be measured  
41 in routine practice and therefore were not within the scope of our study.

42  
43  
44  
45  
46  
47 We chose to dichotomise the GDS-15 to reflect how it would be used in practice, as a screening tool for  
48 identifying patients who would benefit from screening in clinic and potentially signposting to support services.  
49 However, we acknowledge that this may have led to a reduction in power and loss of information.<sup>28</sup>A further  
50 limitation of the study is the use of a cross-sectional design, which means conclusions about direction of  
51 causality are not possible. Finally, whilst the completion rate of the GDS-15 was high, a number of patients  
52 were not screened at the discretion of the practitioners, including because they felt the patient was too ill,  
53 had dementia or had recently been bereaved, or they did not consent for their answers be used for research.  
54 Therefore there may be a risk of bias as the non-completers may be systematically different from those that  
55  
56  
57  
58  
59  
60

1  
2  
3 completed the questionnaire and consented to their data being used. Similarly, we excluded cases with  
4 missing data from the multivariable analysis and this simple approach to missing data may have introduced  
5 some bias. However, as only 113/990 (11%) were excluded, the risk of bias is low  
6  
7

8  
9 For the first time, for a population in England and Wales, our study demonstrates that for patients with vision  
10 impairment, there are several risk factors for depression which can be easily identified by those coming in to  
11 contact with people with sight loss. We recommend that all clinicians working with people with sight loss are  
12 alert to these factors. We advise screening higher risk patients using the simple two question screen  
13 recommended in the NICE guidelines<sup>12</sup>. If a patient is identified as having likely depression they should be  
14 managed according to the guidelines, which includes referral to an appropriate professional, for example, the  
15 GP. Local pathways should be established to manage this referral. However, because the prevalence of  
16 depressive symptoms is so high in low vision clinics, we recommend that low vision practitioners introduce  
17 depression screening as part of routine care with all patients.  
18  
19

20  
21  
22  
23  
24  
25 Future research could include qualitative work to clarify the pathway from the risk factors identified here to  
26 the onset of depression, to aid the development of interventions for depression in this population.  
27

## 28 **ACKNOWLEDGEMENTS**

29  
30  
31 The authors wish to thank the following for data collection: Sandra Jumbe, Rowanne Black, Kathy Davies,  
32 Denise Banford, Ian Cousins, Huw Bellamy, Norma Davies, Ceri Goodman, Sharon Beatty, Lisa Evans, Leighton  
33 Griffiths, Matthew Harvey, David Jenkins, Jane Savage, Marek Karas, John Butler, Seema Rajoria, Rajiv Raja,  
34 Jane De Courcy, Ahalya Subramanian, Sonal Rughani and Sarah Janikoun.  
35  
36  
37

## 38 **FOOTNOTES**

39  
40  
41 **Contributors:** TM, DS, RTE and MS conceived the idea for the study and acquired funding. CN project managed  
42 the study, supervised data collection, performed data cleaning, statistical analysis and wrote the first draft of  
43 the manuscript. CB and BR substantially contributed to the design of the study and to the acquisition of data.  
44 NB and RC contributed to the design of the study. DG provided statistical advice and supervision. All authors  
45 contributed to the design of the protocol, critically reviewed the manuscript for important intellectual content  
46 and approved the final manuscript.  
47  
48  
49

50  
51 **Funding:** The work was supported by Guide Dogs grant number OR2009-07b.  
52

53  
54 **Competing interests:** None declared.  
55

56  
57 **Patient consent:** Not required – no identifiable information from a living individual included.  
58

59  
60 **Ethics approval:** The NHS South East Wales Research Ethics Committee Panel B approved this study.

**Data sharing statement:** There is no additional unpublished data from this study.

## REFERENCES

1. Christ SL, Zheng DD, Swenor BK, et al. Longitudinal relationships among visual acuity, daily functional status, and mortality: the Salisbury Eye Evaluation Study. *JAMA Ophthalmol* 2014;**132**(12):1400-6.
2. Court H, McLean G, Guthrie B, et al. Visual impairment is associated with physical and mental comorbidities in older adults: a cross-sectional study. *BMC Med* 2014;**12**:181.
3. Dargent-Molina P, Favier F, Grandjean H, et al. Fall-related factors and risk of hip fracture: the EPIDOS prospective study. *Lancet* 1996;**348**(9021):145-9.
4. Chou KL. Combined effect of vision and hearing impairment on depression in older adults: evidence from the English Longitudinal Study of Ageing. *J Affect Disord* 2008;**106**(1-2):191-6.
5. Evans JR, Fletcher AE, Wormald RP. Depression and anxiety in visually impaired older people. *Ophthalmology* 2007;**114**(2):283-8.
6. Holloway EE, Sturrock BA, Lamoureux EL, et al. Depression screening among older adults attending low-vision rehabilitation and eye-care services: Characteristics of those who screen positive and client acceptability of screening. *Australas J Ageing* 2015;**34**(4):229-34.
7. Nollett CL, Bray N, Bunce C, et al. Depression in Visual Impairment Trial (DEPVIT): A Randomized Clinical Trial of Depression Treatments in People With Low Vision. *Invest Ophthalmol Vis Sci* 2016;**57**(10):4247-54.
8. Nollett CL, Bray N, Bunce C, et al. High Prevalence of Untreated Depression in Patients Accessing Low-Vision Services. *Ophthalmology* 2016;**123**(2):440-1.
9. Crawford MJ, Prince M, Menezes P, et al. The recognition and treatment of depression in older people in primary care. *Int J Geriatr Psychiatry* 1998;**13**(3):172-6.
10. MacDonald AJ. Do general practitioners "miss" depression in elderly patients? *Br Med J (Clin Res Ed)* 1986;**292**(6532):1365-7.
11. O'Connor DW, Rosewarne R, Bruce A. Depression in primary care. 2: general practitioners' recognition of major depression in elderly patients. *Int Psychogeriatr* 2001;**13**(3):367-74.
12. National Institute for Health and Care Excellence. Depression in adults with a chronic physical health problem: recognition and management. Clinical guideline [CG91]. 2009.
13. van der Aa HP, Xie J, Rees G, et al. Validated Prediction Model of Depression in Visually Impaired Older Adults. *Ophthalmology* 2016;**123**(5):1164-6.
14. Rees G, Xie J, Holloway EE, et al. Identifying distinct risk factors for vision-specific distress and depressive symptoms in people with vision impairment. *Invest Ophthalmol Vis Sci* 2013;**54**(12):7431-8.
15. Heesterbeek TJ, van der Aa HPA, van Rens G, et al. The incidence and predictors of depressive and anxiety symptoms in older adults with vision impairment: a longitudinal prospective cohort study. *Ophthalmic Physiol Opt* 2017;**37**(4):385-98.
16. Sheikh JI, Yesavage JA. Geriatric Depression Scale (GDS): Recent evidence and development of a shorter version. *Clinical Gerontologist: The Journal of Aging and Mental Health* 1986;**5**(1-2):165-73.
17. Bowling A. Just one question: If one question works, why ask several? *J Epidemiol Community Health* 2005;**59**(5):342-5.
18. Ryan B, Court H, Margrain TH. Measuring low vision service outcomes: Rasch analysis of the seven-item National Eye Institute Visual Function Questionnaire. *Optom Vis Sci* 2008;**85**(2):112-21.
19. Margrain TH, Nollett C, Shearn J, et al. The Depression in Visual Impairment Trial (DEPVIT): trial design and protocol. *BMC Psychiatry* 2012;**12**:57.
20. Heinze G, Wallisch C, Dunkler D. Variable selection - A review and recommendations for the practicing statistician. *Biometrical Journal* 2018;**60**(3):431-49.
21. Read JR, Sharpe L, Modini M, et al. Multimorbidity and depression: A systematic review and meta-analysis. *Journal of Affective Disorders* 2017;**221**:36-46.



- 1  
2  
3 22. Centre for Disease Control and Prevention. QuickStats: Prevalence of Current Depression\* Among Persons  
4 Aged  $\geq 12$  Years, by Age Group and Sex — United States, National Health and Nutrition Examination  
5 Survey, 2007–2010. Secondary QuickStats: Prevalence of Current Depression\* Among Persons Aged  
6  $\geq 12$  Years, by Age Group and Sex — United States, National Health and Nutrition Examination Survey,  
7 2007–2010 2012. <https://www.cdc.gov/mmwr/preview/mmwrhtml/mm6051a7.htm>. Accessed 21st  
8 June 2018.  
9
- 10 23. Blanchflower DG, Oswald AJ. Is well-being U-shaped over the life cycle? *Social Science & Medicine*  
11 2008;**66**(8):1733-49.
- 12 24. Hayman KJ, Kerse NM, La Grow SJ, et al. Depression in older people: visual impairment and subjective  
13 ratings of health. *Optom Vis Sci* 2007;**84**(11):1024-30.
- 14 25. Williamson G, Shaffer D. The Activity restriction Model of Depressed Affect. In: Williamson G, Shaffer D,  
15 Parmelee P, eds. *Physical Illness and Depression in Older Adults*: Kluwer Academic Publishers, 2000.
- 16 26. Tabrett DR, Latham K. Factors influencing self-reported vision-related activity limitation in the visually  
17 impaired. *Invest Ophthalmol Vis Sci* 2011;**52**(8):5293-302.
- 18 27. Oehlergiarratana J, Fitzgerald RG. Group-Therapy with Blind Diabetics. *Archives of General Psychiatry*  
19 1980;**37**(4):463-67.
- 20 28. Altman DG, Royston P. Statistics notes - The cost of dichotomising continuous variables. *British Medical*  
21 *Journal* 2006;**332**(7549):1080-80.  
22  
23  
24  
25  
26  
27  
28  
29  
30  
31  
32  
33  
34  
35  
36  
37  
38  
39  
40  
41  
42  
43  
44  
45  
46  
47  
48  
49  
50  
51  
52  
53  
54  
55  
56  
57  
58  
59  
60

**STROBE 2007 (v4) Statement—Checklist of items that should be included in reports of *cross-sectional studies* (Nollett et al)**

| Section/Topic                | Item # | Recommendation                                                                                                                                                                       | Reported on page # |
|------------------------------|--------|--------------------------------------------------------------------------------------------------------------------------------------------------------------------------------------|--------------------|
| <b>Title and abstract</b>    | 1      | (a) Indicate the study's design with a commonly used term in the title or the abstract                                                                                               | 1                  |
|                              |        | (b) Provide in the abstract an informative and balanced summary of what was done and what was found                                                                                  | 2                  |
| <b>Introduction</b>          |        |                                                                                                                                                                                      |                    |
| Background/rationale         | 2      | Explain the scientific background and rationale for the investigation being reported                                                                                                 | 4                  |
| Objectives                   | 3      | State specific objectives, including any prespecified hypotheses                                                                                                                     | 5                  |
| <b>Methods</b>               |        |                                                                                                                                                                                      |                    |
| Study design                 | 4      | Present key elements of study design early in the paper                                                                                                                              | 5                  |
| Setting                      | 5      | Describe the setting, locations, and relevant dates, including periods of recruitment, exposure, follow-up, and data collection                                                      | 5                  |
| Participants                 | 6      | (a) Give the eligibility criteria, and the sources and methods of selection of participants                                                                                          | 5                  |
| Variables                    | 7      | Clearly define all outcomes, exposures, predictors, potential confounders, and effect modifiers. Give diagnostic criteria, if applicable                                             | 6                  |
| Data sources/<br>measurement | 8*     | For each variable of interest, give sources of data and details of methods of assessment (measurement). Describe comparability of assessment methods if there is more than one group | 6, 7               |
| Bias                         | 9      | Describe any efforts to address potential sources of bias                                                                                                                            | 7                  |
| Study size                   | 10     | Explain how the study size was arrived at                                                                                                                                            | -                  |
| Quantitative variables       | 11     | Explain how quantitative variables were handled in the analyses. If applicable, describe which groupings were chosen and why                                                         | 7, 8               |
| Statistical methods          | 12     | (a) Describe all statistical methods, including those used to control for confounding                                                                                                | 8                  |
|                              |        | (b) Describe any methods used to examine subgroups and interactions                                                                                                                  | 8                  |
|                              |        | (c) Explain how missing data were addressed                                                                                                                                          | 8                  |
|                              |        | (d) If applicable, describe analytical methods taking account of sampling strategy                                                                                                   | 8                  |
|                              |        | (e) Describe any sensitivity analyses                                                                                                                                                | -                  |
| <b>Results</b>               |        |                                                                                                                                                                                      |                    |



|                          |     |                                                                                                                                                                                                              |           |
|--------------------------|-----|--------------------------------------------------------------------------------------------------------------------------------------------------------------------------------------------------------------|-----------|
| Participants             | 13* | (a) Report numbers of individuals at each stage of study—eg numbers potentially eligible, examined for eligibility, confirmed eligible, included in the study, completing follow-up, and analysed            | 8         |
|                          |     | (b) Give reasons for non-participation at each stage                                                                                                                                                         | 8         |
|                          |     | (c) Consider use of a flow diagram                                                                                                                                                                           | -         |
| Descriptive data         | 14* | (a) Give characteristics of study participants (eg demographic, clinical, social) and information on exposures and potential confounders                                                                     | 9, 10, 11 |
|                          |     | (b) Indicate number of participants with missing data for each variable of interest                                                                                                                          | 9, 10, 11 |
| Outcome data             | 15* | Report numbers of outcome events or summary measures                                                                                                                                                         | 9-13      |
| Main results             | 16  | (a) Give unadjusted estimates and, if applicable, confounder-adjusted estimates and their precision (eg, 95% confidence interval). Make clear which confounders were adjusted for and why they were included | 9-13      |
|                          |     | (b) Report category boundaries when continuous variables were categorized                                                                                                                                    | 6         |
|                          |     | (c) If relevant, consider translating estimates of relative risk into absolute risk for a meaningful time period                                                                                             | -         |
| Other analyses           | 17  | Report other analyses done—eg analyses of subgroups and interactions, and sensitivity analyses                                                                                                               | -         |
| <b>Discussion</b>        |     |                                                                                                                                                                                                              |           |
| Key results              | 18  | Summarise key results with reference to study objectives                                                                                                                                                     | 16        |
| Limitations              | 19  | Discuss limitations of the study, taking into account sources of potential bias or imprecision. Discuss both direction and magnitude of any potential bias                                                   | 18        |
| Interpretation           | 20  | Give a cautious overall interpretation of results considering objectives, limitations, multiplicity of analyses, results from similar studies, and other relevant evidence                                   | 16-18     |
| Generalisability         | 21  | Discuss the generalisability (external validity) of the study results                                                                                                                                        | 17/18     |
| <b>Other information</b> |     |                                                                                                                                                                                                              |           |
| Funding                  | 22  | Give the source of funding and the role of the funders for the present study and, if applicable, for the original study on which the present article is based                                                | 19        |

\*Give information separately for cases and controls in case-control studies and, if applicable, for exposed and unexposed groups in cohort and cross-sectional studies.

**Note:** An Explanation and Elaboration article discusses each checklist item and gives methodological background and published examples of transparent reporting. The STROBE checklist is best used in conjunction with this article (freely available on the Web sites of PLoS Medicine at <http://www.plosmedicine.org/>, Annals of Internal Medicine at <http://www.annals.org/>, and Epidemiology at <http://www.epidem.com/>). Information on the STROBE Initiative is available at [www.strobe-statement.org](http://www.strobe-statement.org).
